# Supplementary material for: MRNIP condensates promote DNA double-strand break sensing and end resection
Source: PubMed Central journal article supplement (PMC9098523; doi:10.1038/s41467-022-30303-w), 2022-05-12
Supplement: 41467_2022_30303_MOESM1_ESM.pdf [file 41467_2022_30303_MOESM1_ESM.pdf]

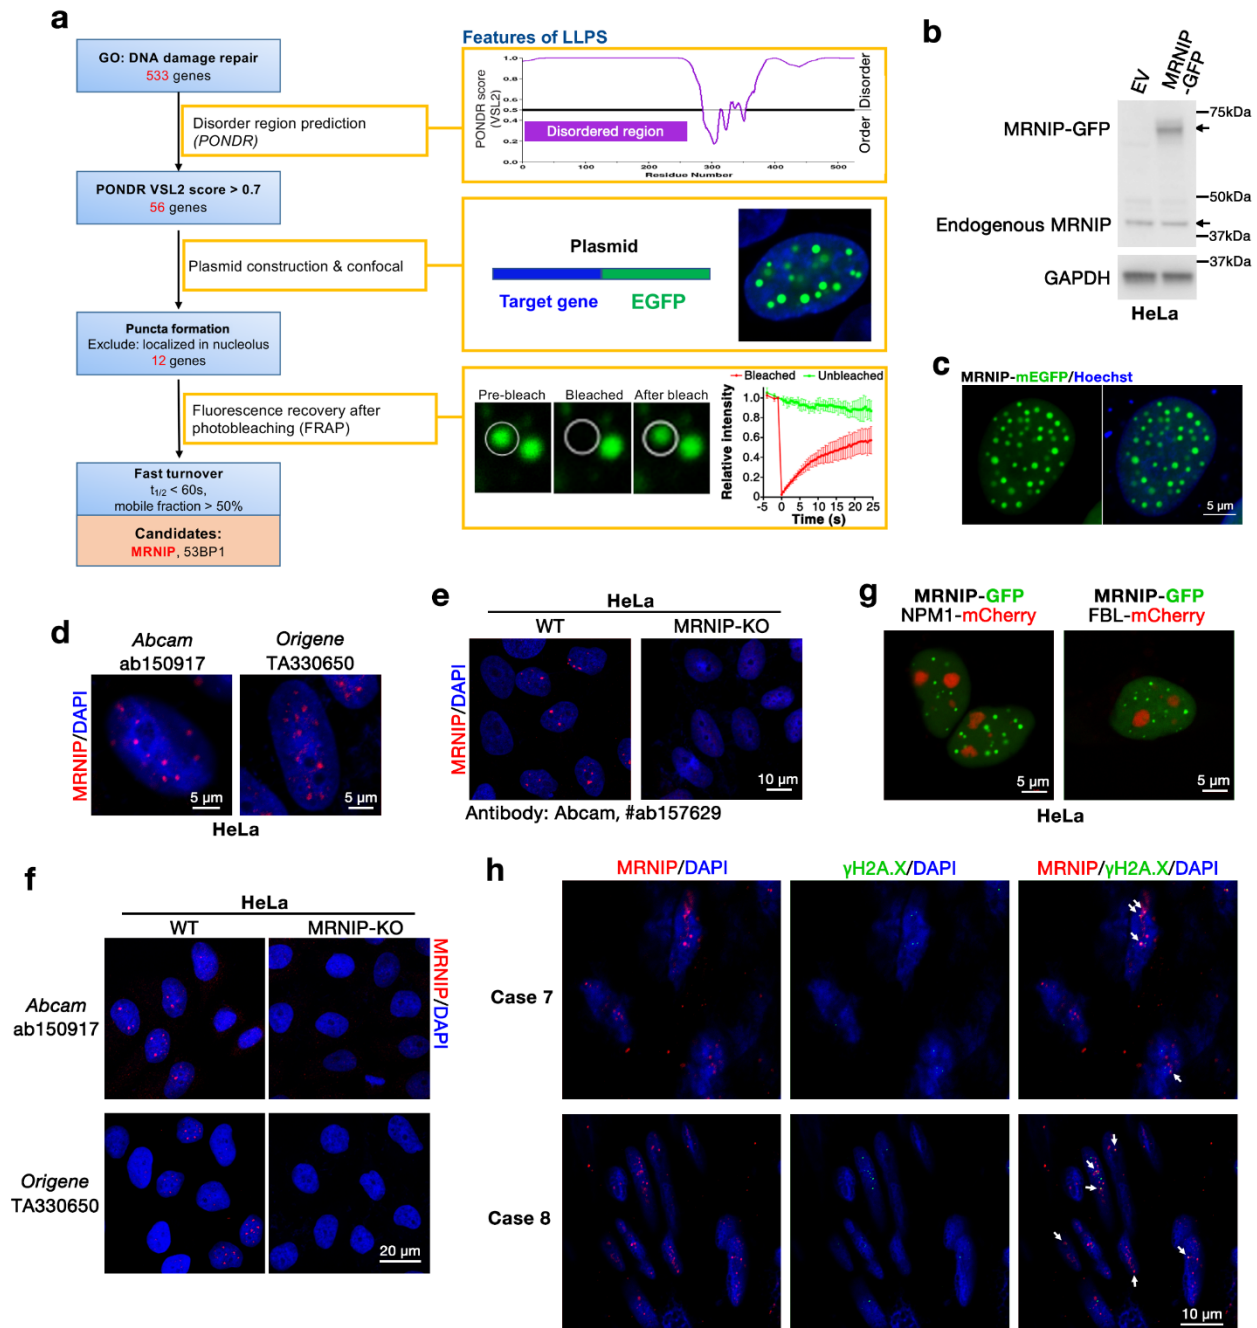

**Supplementary Figure 1. MRNIP formed puncta in tumor cells.** **a** Screening of DNA damage repair-related proteins that undergo LLPS. Briefly, all genes annotated as DNA repair genes in the Gene Ontology database were identified and subjected to disorder region analysis with PONDR (<http://www.pondr.com/>). Fifty-six highly scored proteins were cloned into GFP fusion vectors, which were transduced into cells subjected to living cell imaging in order to detect puncta formation. A total of 16 proteins were found to form puncta in cells. Excluding 4

nucleoli-localizing proteins, 12 puncta-positive proteins were subjected to the fluorescence recovery after photobleaching (FRAP) assay. Detailed information was provided in Supplementary Table 1. **b** MRNIP-GFP were expressed in HeLa cells. **c** MRNIP-mEGFP protein formed puncta in the nucleus. **d** IF assays showed MRNIP formed puncta in HeLa cells. **e-f** IF assays using 3 individual antibodies were performed to detect MRNIP in HeLa wildtype and MRNIP knock out cells. **g** MRNIP-GFP were not overlapped with nucleolus. HeLa cells were transfected with indicated plasmid and observed with confocal microscopy. For (**b-c, g**), HeLa cells were transfected with indicated plasmid for 24 hours before detection. **h** Co-staining of MRNIP and  $\gamma$ -H2A.X in CRC tissues. MRNIP (Abcam, ab150917) and  $\gamma$ -H2A.X (CST, #80312) antibody were used. White arrow, the merged puncta of MRNIP and  $\gamma$ -H2A.X.

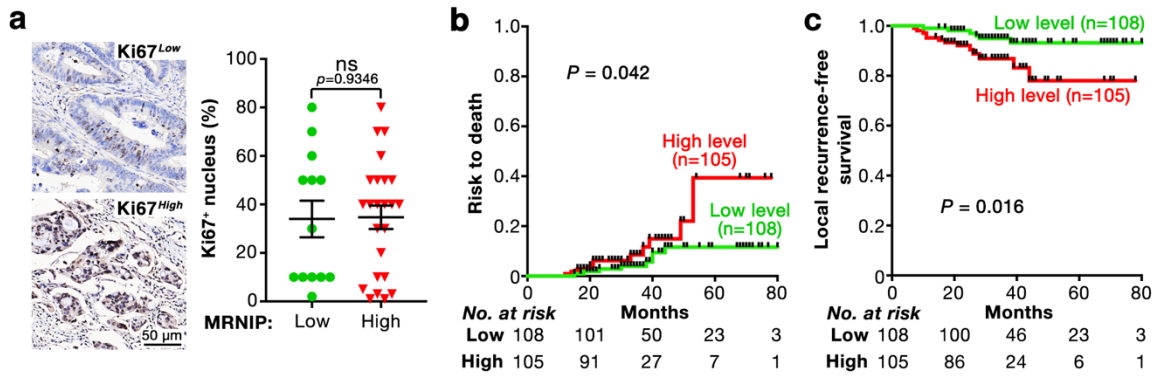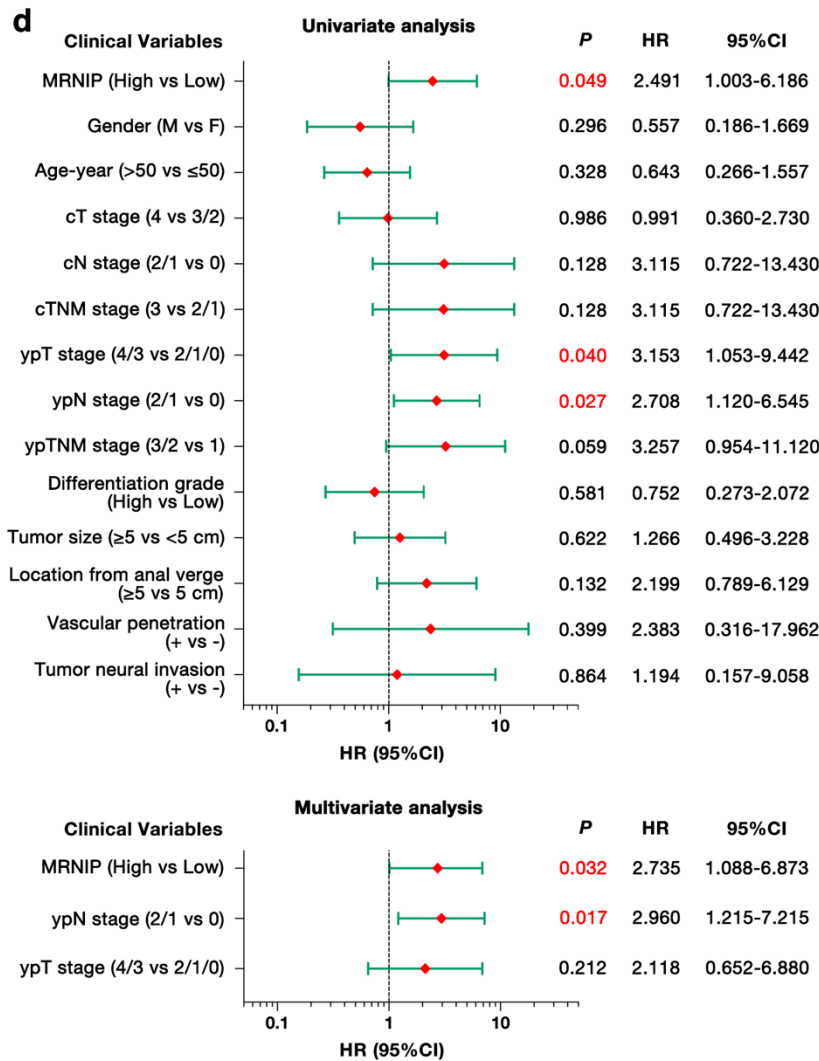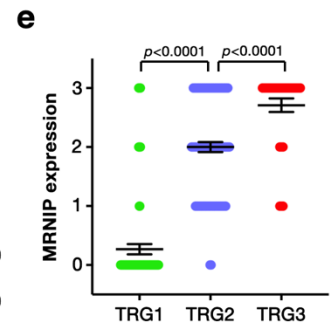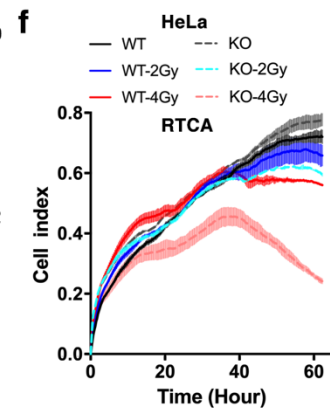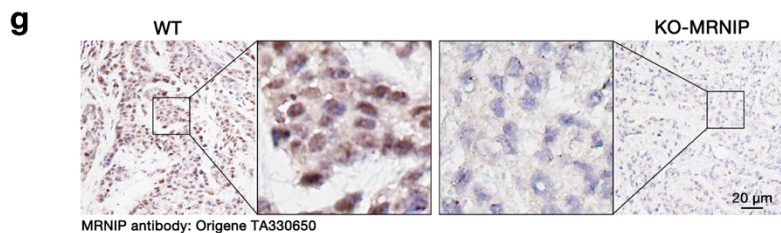

**Supplementary Figure 2. High expression of MRNIP was associated with the radioresistance and poor prognosis of CRC patients. a** The expression level of MRNIP has

no correlation with the proliferation marker Ki67 level. Data are presented as means  $\pm$  SEM. MRNIP-Low,  $n = 13$ ; MRNIP-High,  $n = 24$ . Two-tailed unpaired Student's  $t$  test. **b-c** Higher MRNIP expression was correlated with shorter survival time of CRC patients. The correlations were analyzed with Kaplan-Meier curve and Log-rank test. **d** The multivariate analysis showed that MRNIP level served as an independent prognostic factor for overall survival of CRC patients.  $n = 213$ . The hazard ratio (HR) and log-rank  $P$  value are indicated. MRNIP level, ypN stage and ypT stage were included in the multivariate analysis. **e** Patients with poor response (TRG2-3) to radiotherapy had a higher MRNIP level than patients with a good response (TRG1). Data are presented as means  $\pm$  SEM.  $n = 82$  (TRG1),  $n = 100$  (TRG2),  $n = 31$  (TRG3). Two-tailed unpaired Student's  $t$  test. **f** Knocking out of MRNIP has no influence on cell proliferation and sensitized tumor cells to irradiation. Cell viability was examined with RTCA.  $n = 2$  biological replicates. **g** IHC assay showed that MRNIP was depleted in the xenografts derived from HeLa-KO-MRNIP cells. ns, no significance.



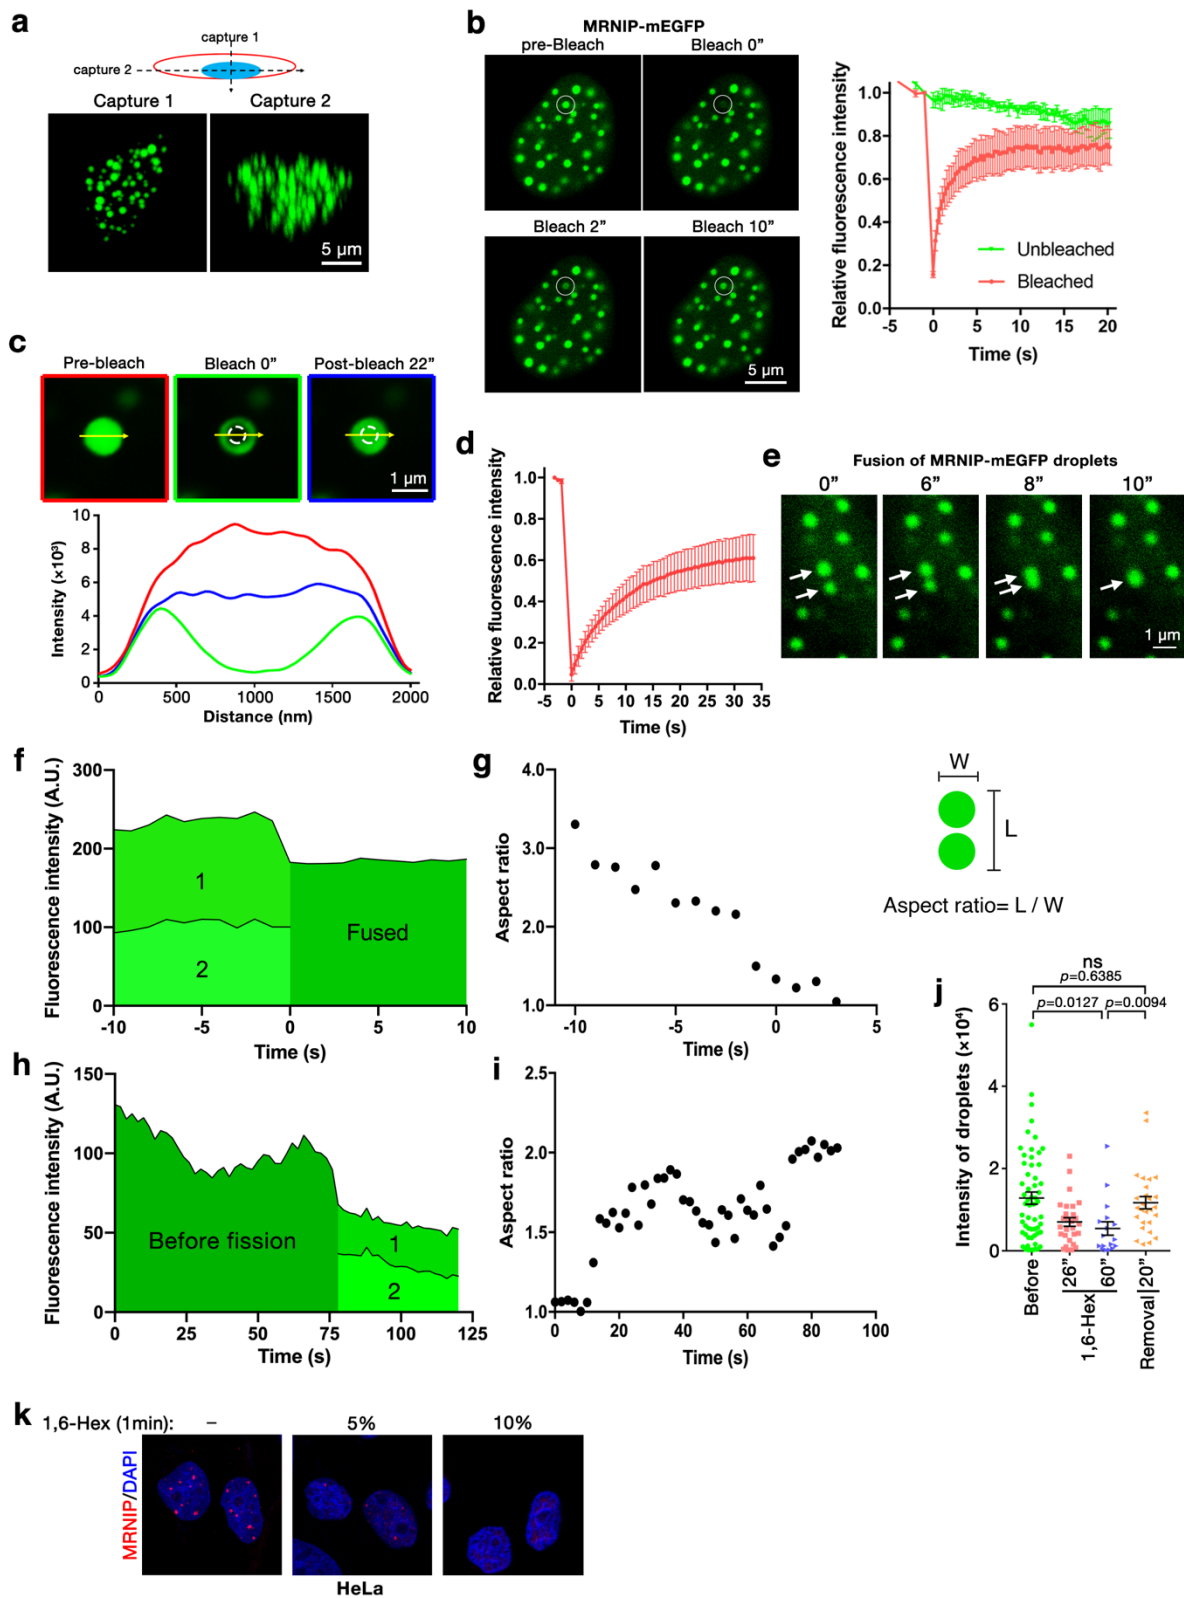

**Supplementary Figure 3. MRNIP-GFP formed liquid-like droplets *in vivo*.** **a** 3D capture of MRNIP-GFP in live cells. **b** FRAP of MRNIP-mEGFP in cells. Data are presented as means  $\pm$  SEM.  $n = 3$  foci analysed in 3 independent experiments. **c-d** FRAP of a region within the

droplet in live cell. Data are presented as means  $\pm$  SEM.  $n = 3$  foci analysed in 3 independent experiments. **e** Fusion of different MRNIP-mEGFP droplets was observed in cells. For (**a-e**), HeLa cells were transfected with indicated plasmid for 24 hours before observation. **f-g** the intensity and aspect ratio of droplets in Fig. 2c were calculated. **h-i** the intensity and aspect ratio of droplets in Fig. 2d were calculated. **j** the impact of 1,6-hex on droplets intensity in Fig. 2e. Data are presented as means  $\pm$  SEM.  $n = 58$  (Before),  $n = 28$  (1,6-Hex 20''),  $n = 17$  (1,6-Hex 60''),  $n = 27$  (Removal 20''). Two-tailed unpaired Student's *t* test. **k** The impact of 1,6-hex on endogenous MRNIP puncta of HeLa cells were examined using IF assay. ns, no significance.

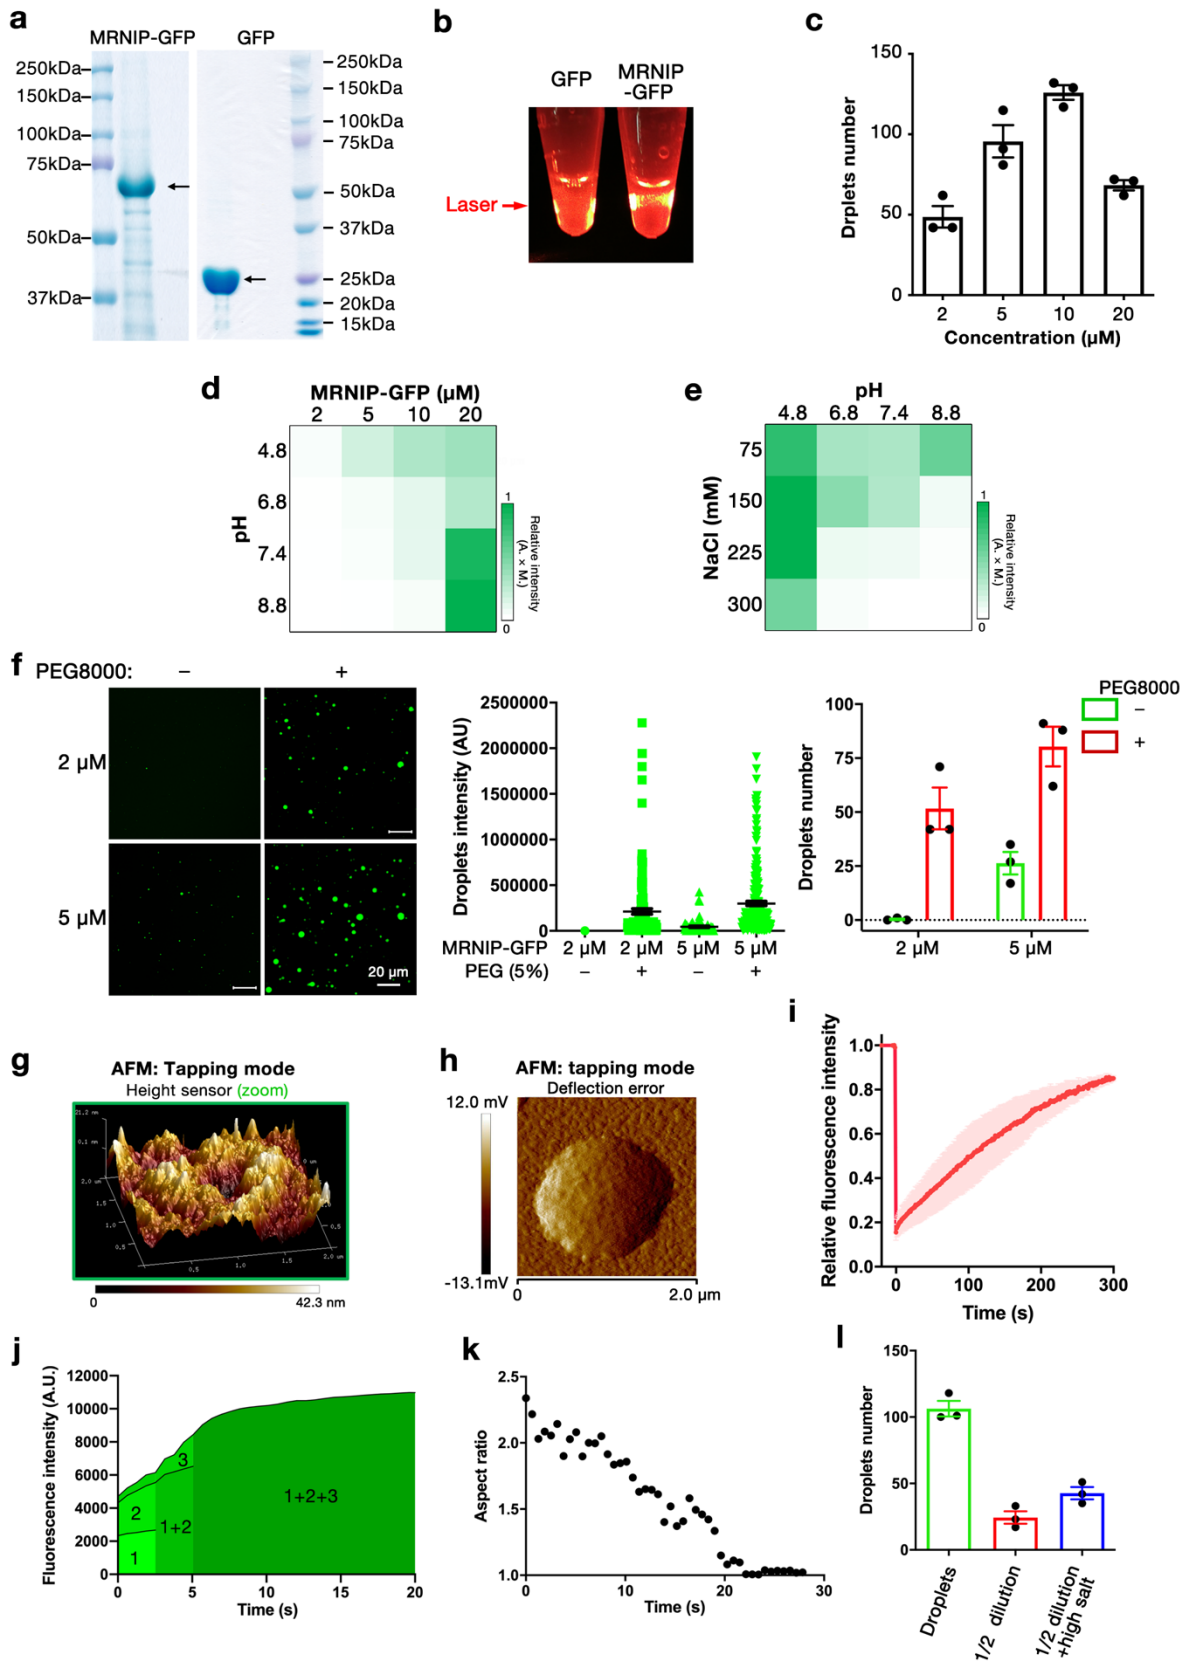

**Supplementary Figure 4. Recombinant MRNIP-GFP formed liquid-like droplets *in vitro*.**

**a** Coomassie staining of purified MRNIP-GFP and GFP. **b** Tyndall effect of muddy MRNIP-

GFP solution. Ten micromolar protein was used. **c** The fluorescence intensity of MRNIP droplets in Fig. 2h were calculated. Data are presented as means  $\pm$  SEM.  $n = 3$  biological replicates. **d-e** The impact of protein concentration, NaCl concentration and pH on the formation of MRNIP-GFP droplets. **f** PEG-8000 enhanced the formation of MRNIP-GFP droplets. Data are presented as means  $\pm$  SEM. *Left panel:  $n = 1$  ( $2 \mu\text{M}$ -PEG),  $n = 155$  ( $2\mu\text{M}$ +PEG),  $n = 76$  ( $5\mu\text{M}$ -PEG),  $n = 241$  ( $5\mu\text{M}$ +PEG); *Right panel:  $n = 3$  biological replicates.* **g-h** Characterization of the morphology of MRNIP droplets using AFM in tapping mode. **i** region within the MRNIP-GFP droplets was photobleached, and fluorescence recovered rapidly. Related to Fig. 2l. Data are presented as means  $\pm$  SEM.  $n = 2$  independent experiments. **j-k** The fluorescence intensity and aspect ratio of MRNIP droplets in Fig. 2m were calculated. **l** Droplets number in Fig. 2n were counted. Data are presented as means  $\pm$  SEM.  $n = 3$  biological replicates.*

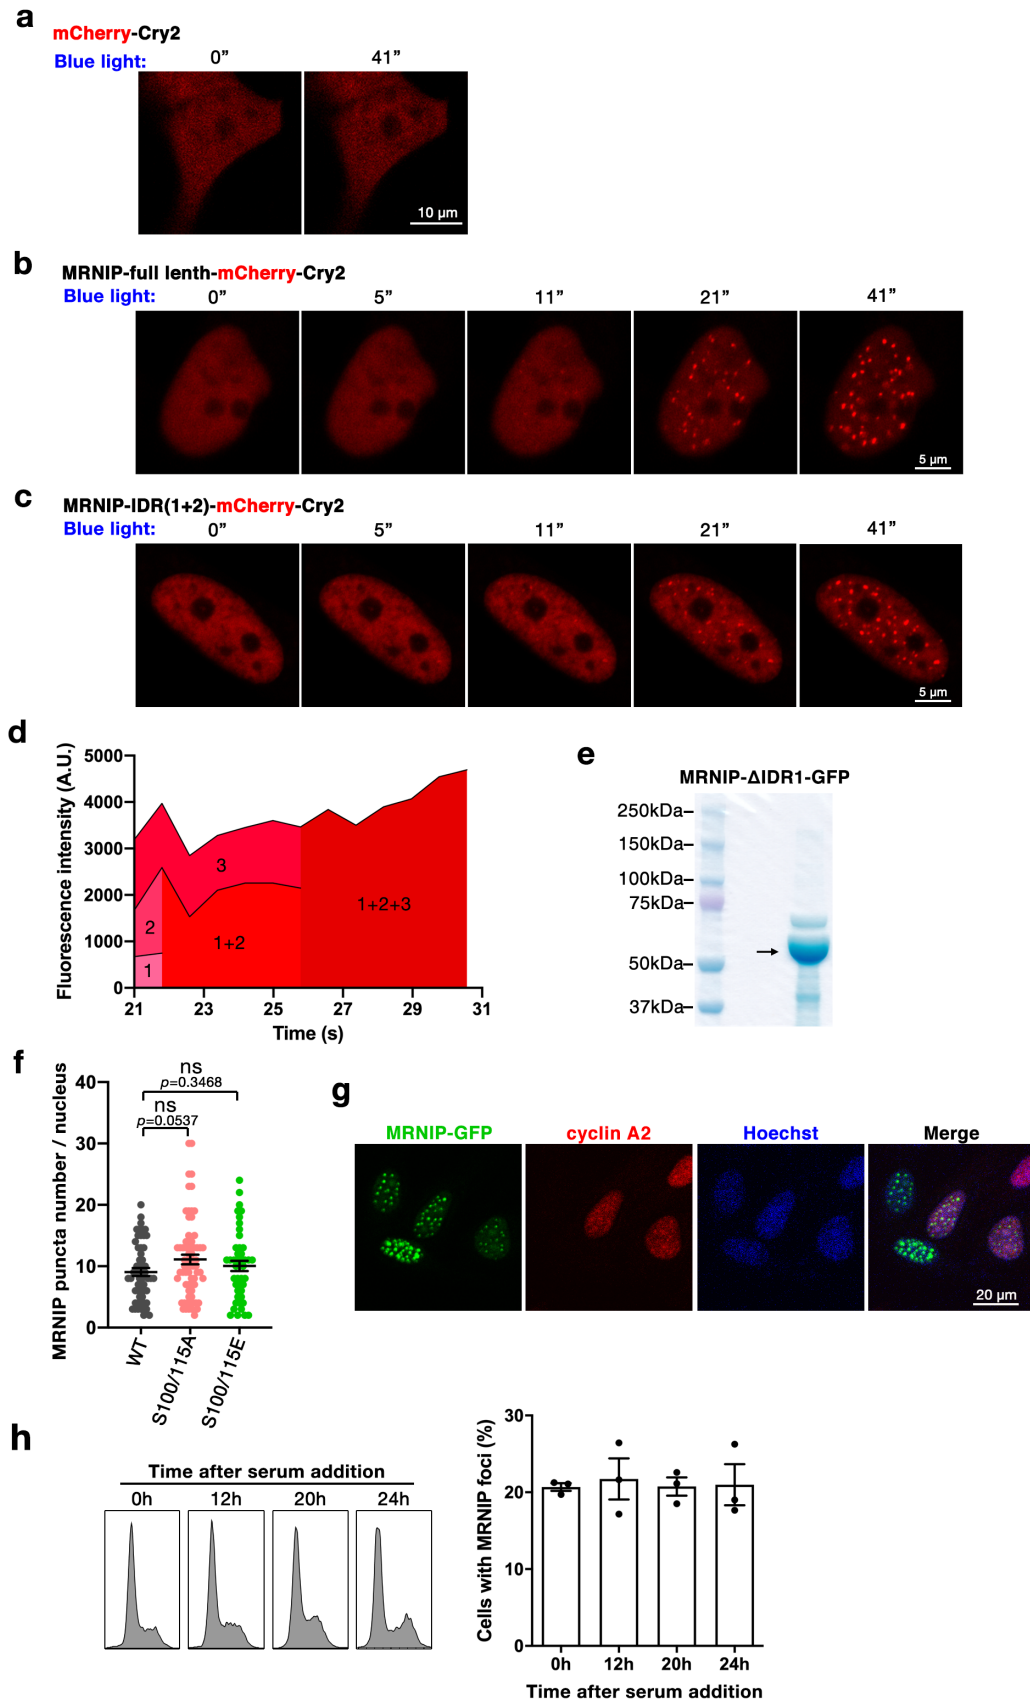

Supplementary Figure 5. The IDR1 is required for LLPS of MRNIP. a Blue light has no

influence on Cry2-mcherry protein. **b-c** MRNIP full length- and IDR(1+2)-Cry2-mCherry protein formed puncta under blue light stimulation (488 nm). **d** The fluorescence intensity of blue light-induced droplets in Fig. 3g were calculated. **e** Coomassie staining of recombinant MRNIP- $\Delta$ IDR1-GFP protein. **f** mutating S100/115 to A or E has no impact on MRNIP puncta formation. Data are presented as means  $\pm$  SEM.  $n = 54$  cells (WT),  $n = 69$  cells (S100/115A),  $n = 45$  cells (S100/115E). Two-tailed unpaired Student's *t* test. **g** MRNIP condensates were presented in both cyclin A2 positive and negative cells. For (**a-d**, **f-g**), HeLa cells were transfected with indicated plasmid for 24 hours before observation. **h** MRNIP condensates positive cell population remained stable in serum deprivation-releasing model. HeLa cells were cultured in serum free medium for 48 hours before re-adding 15% serum-containing medium. After incubation for indicating time, cells were harvest for FACS or IF assay. Data are presented as means  $\pm$  SEM.  $n = 3$  biological replicates. ns, no significance.

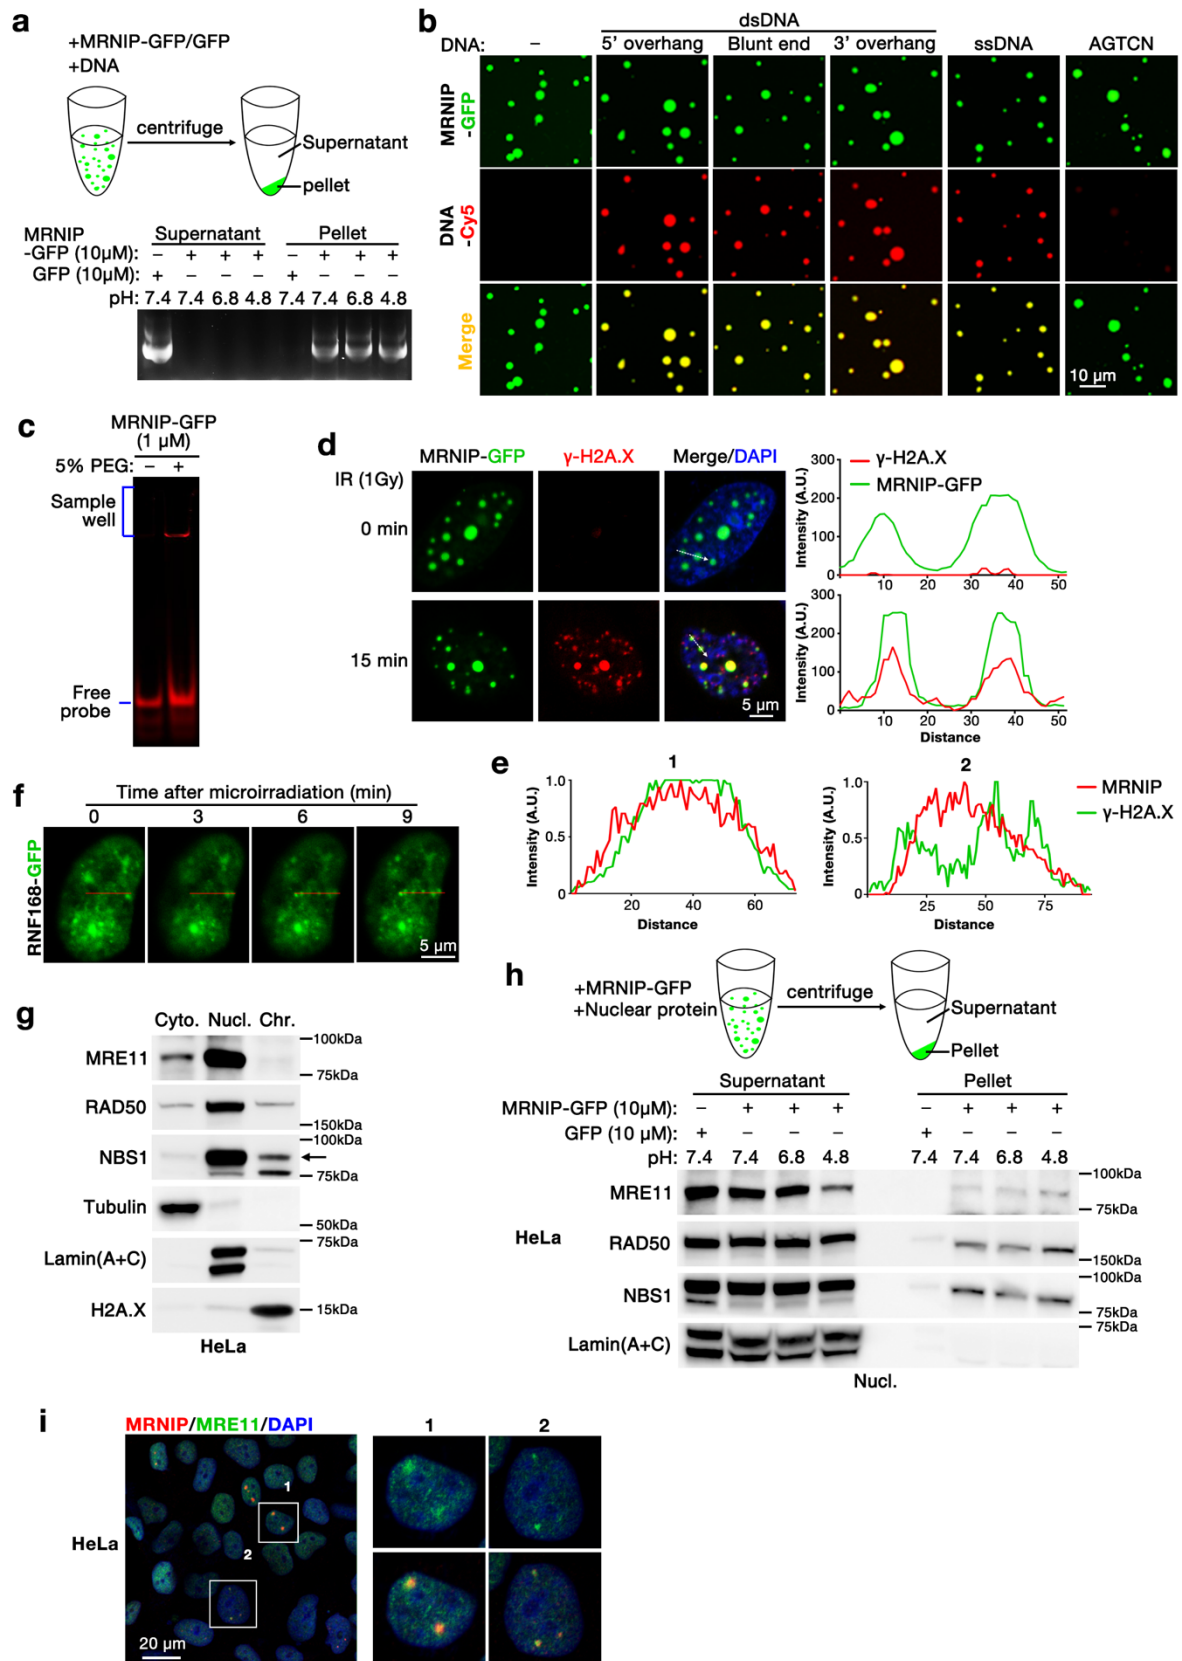

Supplementary Figure 6. MRNIP condensates recruit DNA and the MRN complex. **a** The impact of different pH values on the recruitment of DNA by MRNIP condensates. **b** MRNIP-



GFP incorporated Cy5-tagged DNA in vitro. Ten micromolar MRNIP was incubated with 2  $\mu$ M Cy5-tagged dsDNA in buffer containing 150 mM NaCl, pH 7.4. **c** MRNIP-GFP droplets recruited and detained DNA in the gel assay. MRNIP (1  $\mu$ M) was incubated with 0.5  $\mu$ M Cy5-dsDNA in buffer containing 150 mM NaCl (pH 7.4) with or without 5% PEG8000. **d**  $\gamma$ -H2A.X localized within MRNIP droplets in cells after 15 minutes' recovery after irradiation. HeLa cells stably expressing MRNIP-GFP were irradiated (1Gy) and subjected to  $\gamma$ -H2A.X detection at indicating time. **e** The profile of fluorescence intensity in Fig. 4b was analyzed. **f** microirradiation induced the accumulation of RNF168-GFP at DNA damage site. HeLa cells were transfected with plasmid and incubated with 10  $\mu$ M BrdU for 24 hours before microirradiation assay. **g** The fractionation of cytoplasmic, nuclear and chromatin protein.  $\alpha$ -Tubulin, Lamin A/C and H2A.X were used as the respective internal controls. **h** The impact of different pH values on the recruitment of MRN complexes by MRNIP condensates. **i** IF assay showed that MRNIP puncta was colocalized with MRE11 in HeLa cells.  $n = 3$  biological replicates.

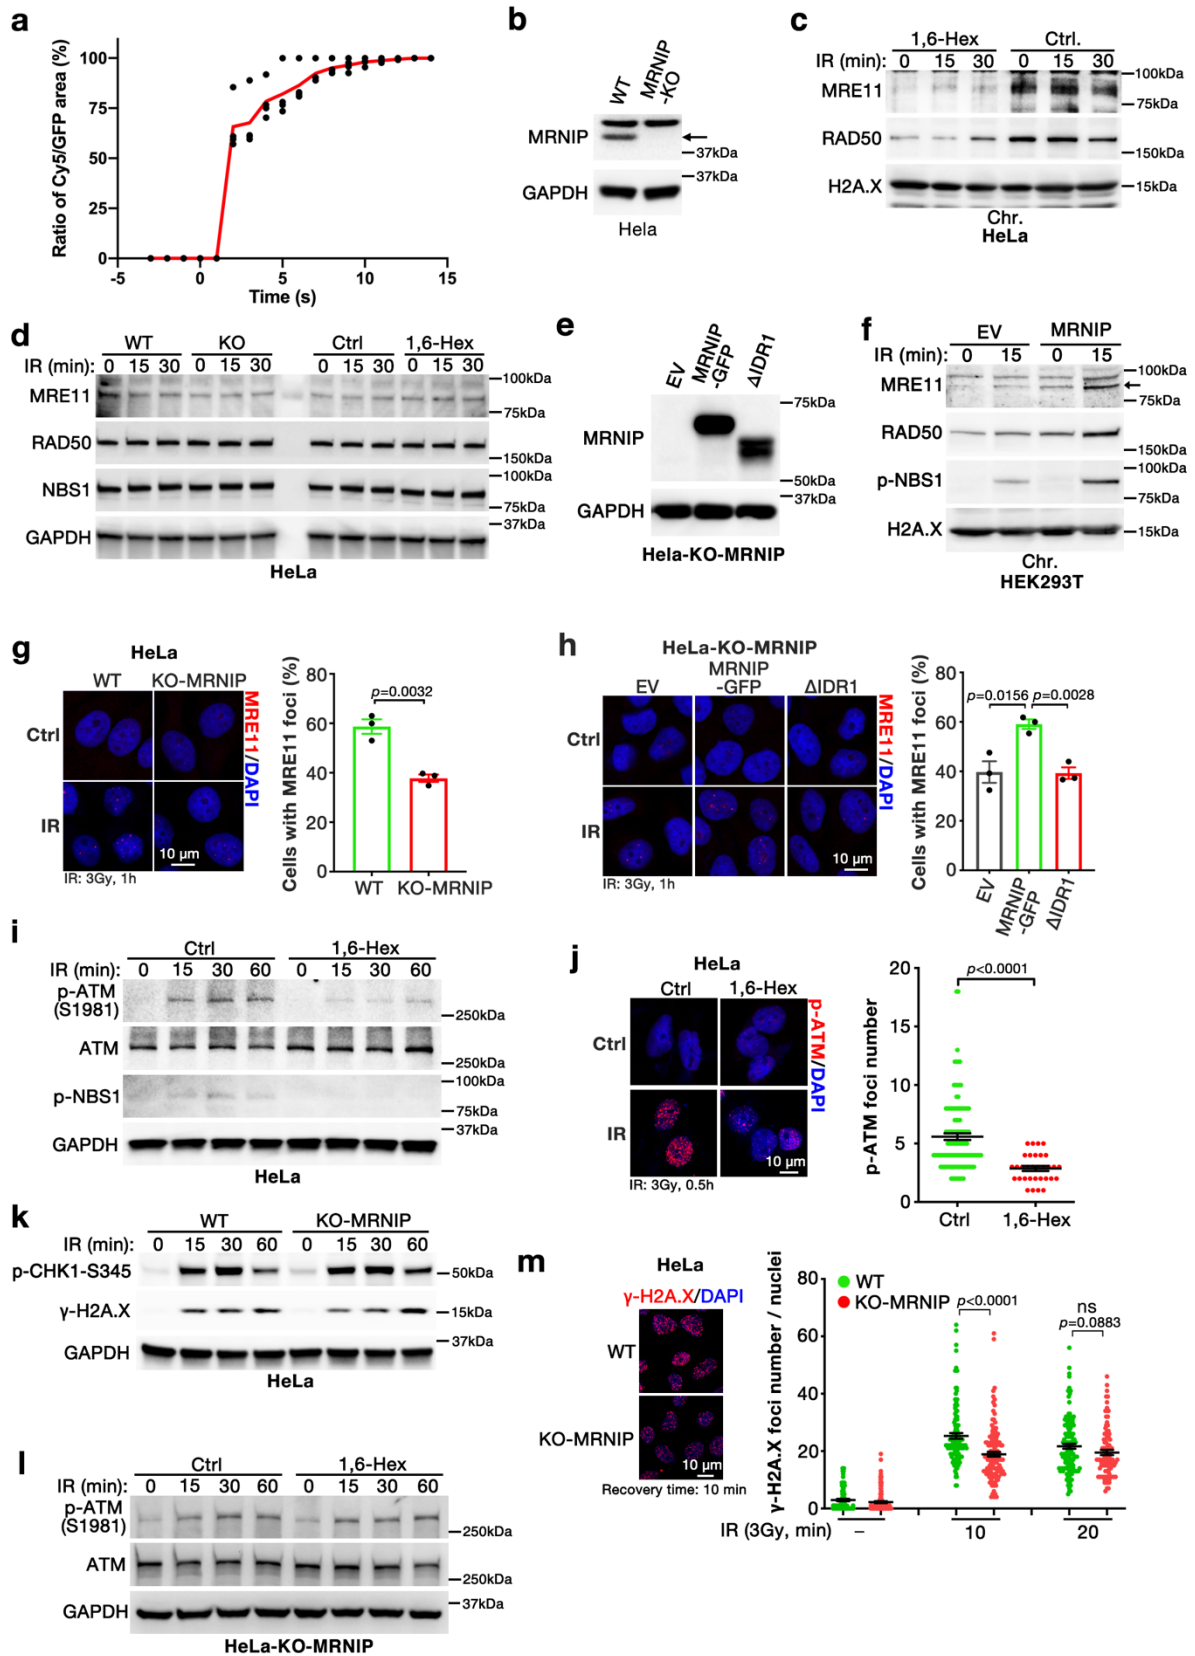

**Supplementary Figure 7. MRNIP condensates accelerate the MRN complex loading and ATM activation.** **a** The ratio of Cy5 and GFP-occupied area of each droplet in Fig. 5b was

calculated. **b** MRNIP was knocked out in HeLa cells. **c** 1,6-hexanediol (1.5%) treatment reduced radiation-induced MRN complex binding to chromatin. Chromatin was fractionated at the indicated time after irradiation (10Gy). **d** MRNIP depletion or 1,6-hexanediol (1.5%) treatment had no impact on MRN expression in whole cell lysate. For (**c-d**), 1,6-hexanediol was added to the culture medium just before irradiation. **e** Restoration of MRNIP-GFP or MRNIP- $\Delta$ IDR1-GFP in HeLa-KO-MRNIP cells. **f** Overexpression of MRNIP enhanced MRN complex loading after radiation-induced DNA damage. IR: 10 Gy. HEK293T cells were transfected with plasmid for 24 hours before irradiation. **g-h** IF assays were performed to investigate the impact of MRNIP condensates on radiation-induced MRE11 foci. Data are presented as means  $\pm$  SEM;  $n = 3$  biological replicates. Two-tailed unpaired Student's *t* test. For (**e, h**), HeLa-KO-MRNIP cells stably expressing sgRNA-resistant MRNIP-GFP, MRNIP- $\Delta$ IDR1-GFP ( $\Delta$ IDR1) and empty vector (EV) were used. **i** The impact of 1,6-hexanediol (1.5%) treatment on radiation-induced ATM and NBS1 phosphorylation. IR: 3Gy. **j** IF assays were performed to analyze the impact of 1,6-hexanediol (1.5%) treatment on radiation-induced ATM phosphorylation. HeLa cells were irradiated with 3 Gy. Data are presented as means  $\pm$  SEM;  $n = 114$  cells (Ctrl),  $n = 32$  cells (1,6-Hex). Two-tailed unpaired Student's *t* test. **k** The impact of MRNIP depletion on radiation-induced CHK1 phosphorylation. HeLa cells were irradiated with 10 Gy. **l** 1,6-hexanediol had no impact on radiation-induced p-ATM in HeLa-KO-MRNIP cells. IR: 10Gy. **m** MRNIP knockout inhibited the radiation-induced accumulation of  $\gamma$ -H2A.X. Data are presented as means  $\pm$  SEM. IR:  $n = 105$  (WT),  $n = 113$  (KO); IR 10min:  $n = 115$  (WT),  $n = 130$  (KO); IR 20min:  $n = 125$  (WT),  $n = 96$  (KO). Two-tailed unpaired Student's *t* test. ns, no significance.

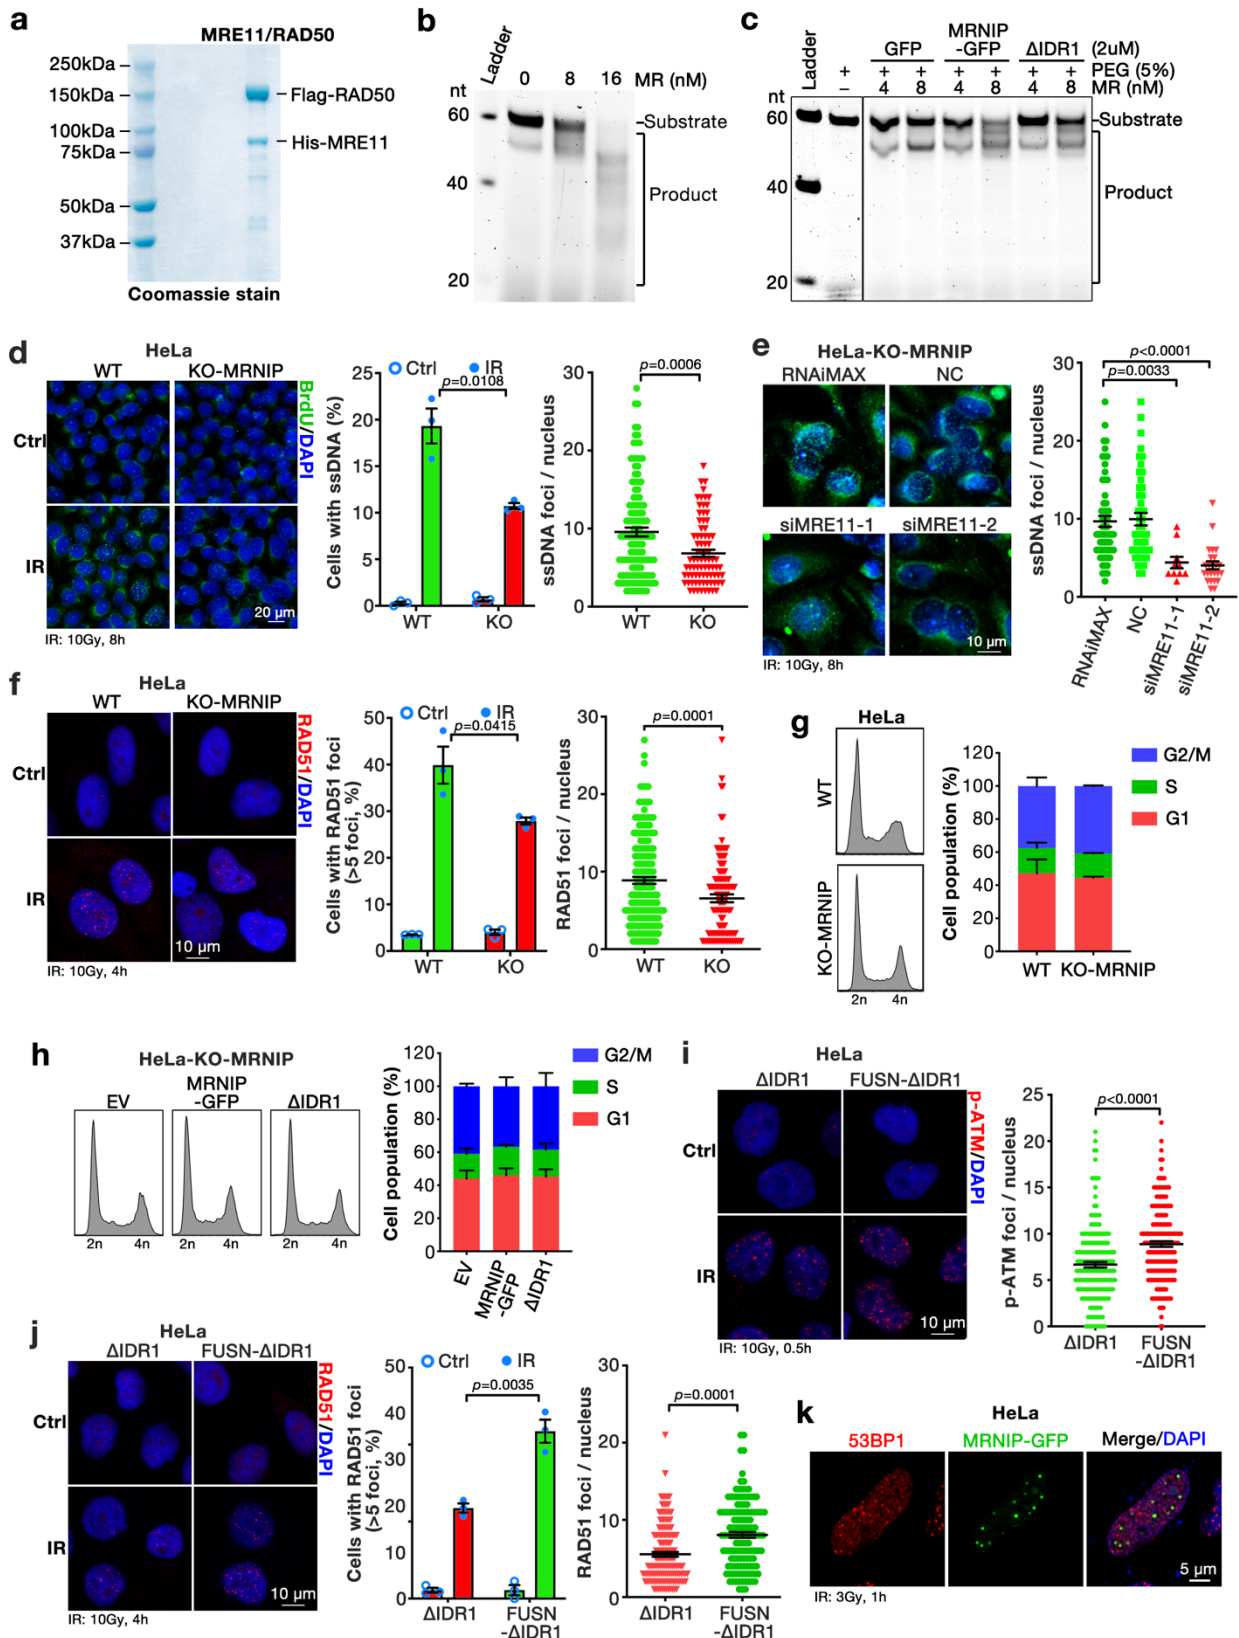

**Supplementary Figure 8. MRNIP condensates promote DNA end resection. a** Characterization of the MRE11/RAD50 (MR) complex with Coomassie Staining. **b** The

MRE11/RAD50 (MR) complex catalysed the 3' to 5' degradation of dsDNA. **c** MRNIP promoted the degradation of dsDNA by the MRE11/RAD50 complex, whereas its IDR1-deleted mutant had no effect in the presence of PEG-8000 (5%). The final concentration of GFP, MRNIP-GFP or  $\Delta$ IDR1-GFP was 2  $\mu$ M. **d-e** MRNIP knockout or MRE11 knockdown reduced radiation-induced anti-BrdU foci. Data are presented as means  $\pm$  SEM. Two-tailed unpaired Student's *t* test. **d**, *Middle panel*: *n* = 3 biological replicates; *Right panel*: *n* = 123 (WT), *n* = 81 (KO-MRNIP). **e**, *n* = 59 (RNAiMAX), *n* = 48 (siGFP), *n* = 10 (siMRE11-1), *n* = 24 (siMRE11-2). **f** MRNIP knockout reduced radiation-induced anti-RAD51 foci. Data are presented as means  $\pm$  SEM. Two-tailed unpaired Student's *t* test. *Middle panel*: *n* = 3 biological replicates; *Right panel*: *n* = 169 (WT), *n* = 108 (KO-MRNIP). **g-h** MRNIP condensates had no impact on cell cycle. Data are presented as means  $\pm$  SEM; *n* = 2 biological replicates. For **(h)**, HeLa cells stably expressing sgRNA-resistant MRNIP-GFP, MRNIP- $\Delta$ IDR1-GFP ( $\Delta$ IDR1) and empty vector (EV) were used. **i-j** FUSN- $\Delta$ IDR1 increased p-ATM and RAD51 foci after radiation in HeLa-MRNIP-KO cells. HeLa-KO-MRNIP cells stably expressing sgRNA-resistant MRNIP- $\Delta$ IDR1-GFP ( $\Delta$ IDR1) and FUSN-MRNIP- $\Delta$ IDR1-GFP (FUSN- $\Delta$ IDR1) were used. Data are presented as means  $\pm$  SEM; Two-tailed unpaired Student's *t* test. **i**, *n* = 182 ( $\Delta$ IDR1), *n* = 177 (FUSN- $\Delta$ IDR1). **j**, *Middle panel*: *n* = 3 biological replicates. *Right panel*: *n* = 143 ( $\Delta$ IDR1), *n* = 129 (FUSN- $\Delta$ IDR1). **k** MRNIP puncta had no association with 53BP1 foci in HeLa cells. HeLa cells stably expressing sgRNA-resistant MRNIP-GFP were irradiated (3Gy) for 1 hour before IF assay.

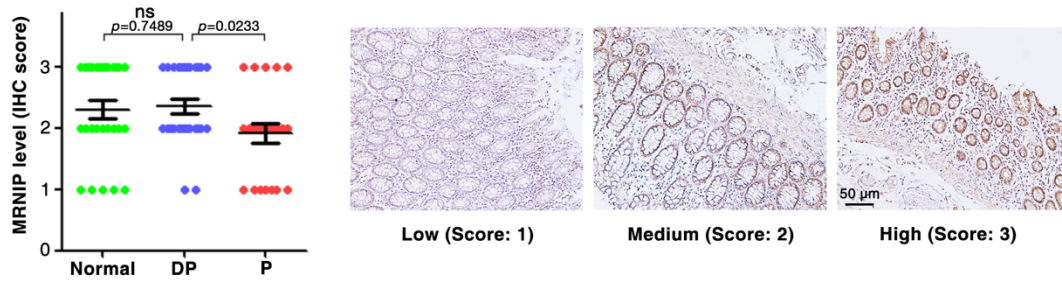

**Supplementary Figure 9. MRNIP protein level was reduced in radiation-induced proctitis tissues.** *Right panel*, the representative images of IHC score. Normal, adjacent normal colon tissues of CRC patients who didn't receive radiotherapy; P, radiation-induced proctitis tissues; DP, distal proctitis tissues. *Left panel*, Data are presented as means  $\pm$  SEM;  $n = 27$  (Normal),  $n = 28$  (DP),  $n = 23$  (P). Two-tailed unpaired Student's  $t$  test. ns, no significance.

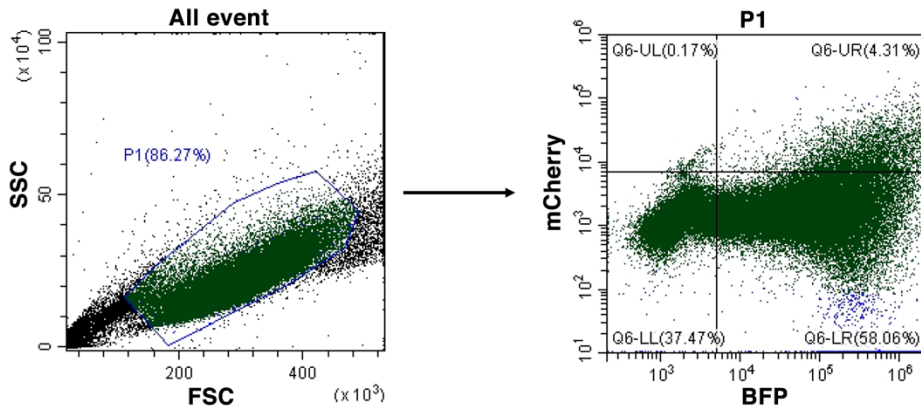

**Supplementary Figure 10. Flow cytometry gating.** Example of flow cytometry gating strategy used in DSB reporter experiments of Fig. 7a and Fig. 7k.



**Supplementary Table 1. Disordered region analysis of DNA repair genes (PONDR)**

| gene symbol <sup>a</sup> | accession number | PONDR score | puncta?                      | gene symbol | accession number | PONDR score | puncta? | gene symbol    | accession number | PONDR score | puncta?        |
|--------------------------|------------------|-------------|------------------------------|-------------|------------------|-------------|---------|----------------|------------------|-------------|----------------|
| HMGA2                    | NP_003474.1      | 0.998       | Yes <sup>b</sup>             | HMGA1       | NP_665908.1      | 0.9975      | Yes     | HMGN1          | NP_004956.5      | 0.9945      | No             |
| TNP1                     | NP_003275.1      | 0.9935      | Yes (nucleoli <sup>c</sup> ) | NUCKS1      | NP_073568.2      | 0.9879      | No      | PAGR1          | NP_078792.1      | 0.9287      | No             |
| HMGB2                    | NP_002120.1      | 0.9214      | No <sup>b</sup>              | NCOA6       | NP_054790.2      | 0.8955      | No      | INO80B         | NP_112578.2      | 0.8924      | Yes (nucleoli) |
| FUS                      | NP_004951.1      | 0.8894      | No                           | GGN         | NP_689870.3      | 0.8784      | Yes     | INO80E         | NP_775889.1      | 0.8578      | Yes (nucleoli) |
| RAD51AP1                 | NP_006470.1      | 0.8569      | Yes                          | HMGB1       | NP_002119.1      | 0.8511      | No      | TNKS1BP1       | NP_203754.2      | 0.8511      | No             |
| PCLAF                    | NP_055551.1      | 0.8257      | No                           | CEP164      | NP_055771.4      | 0.8247      | No      | BOD1L1         | NP_683692.2      | 0.8247      | No             |
| SFPQ                     | NP_005057.1      | 0.8238      | No                           | RNF169      | NP_001092108.1   | 0.8226      | No      | CLSPN          | NP_071394.2      | 0.8164      | No             |
| NOP53                    | NP_056525.2      | 0.8076      | Yes (nucleoli)               | RNF111      | NP_060080.6      | 0.8075      | No      | MDC1           | NP_055456.2      | 0.8053      | No             |
| FMN2                     | NP_064450.3      | 0.7987      | No                           | CDCA5       | NP_542399.1      | 0.7976      | No      | CEBPG          | NP_001797.1      | 0.7911      | No             |
| SLX4                     | NP_115820.2      | 0.788       | No                           | RBM14       | NP_006319.1      | 0.7845      | Yes     | SYCP1          | NP_003167.2      | 0.7808      | No             |
| DEK                      | NP_003463.1      | 0.7803      | No                           | RNF168      | NP_689830.2      | 0.7764      | Yes     | EMSY           | NP_001287872.1   | 0.7752      | No             |
| TFPT                     | NP_037474.1      | 0.7721      | No                           | TP53BP1     | NP_001135452.1   | 0.7689      | Yes     | SFR1           | NP_660290.3      | 0.7688      | No             |
| PPP4R2                   | NP_777567.1      | 0.7681      | No                           | SETD2       | NP_054878.5      | 0.7616      | No      | RTEL1-TNFRSF6B | PNJ02870.1       | 0.7589      | No             |
| UIMC1                    | NP_001186227.1   | 0.7576      | Yes                          | CETN2       | NP_004335.1      | 0.7517      | No      | RHNO1          | NP_001239428.1   | 0.7485      | No             |
| POLD3                    | NP_006582.1      | 0.7477      | Yes                          | EP300       | NP_001420.2      | 0.7475      | No      | MRNIP          | NP_057259.2      | 0.7469      | Yes            |
| PTTG1                    | NP_004210.1      | 0.7369      | Yes                          | FOXO1       | NP_068772.2      | 0.7344      | No      | NONO           | NP_031389.3      | 0.7302      | No             |
| RBBP8                    | NP_002885.1      | 0.7281      | Yes                          | CYREN       | NP_001350258.1   | 0.726       | No      | TWIST1         | NP_000465.1      | 0.7195      | No             |
| FAAP20                   | NP_872339.2      | 0.7185      | No                           | TICRR       | NP_689472.3      | 0.7129      | No      | ATRX           | NP_000480.3      | 0.7081      | No             |
| SWI5                     | NP_001305018.1   | 0.706       | No                           | CETN1       | NP_004057.1      | 0.706       | No      | CHAF1A         | NP_005474.2      | 0.6967      |                |
| INO80D                   | NP_060229.3      | 0.6925      |                              | ETAA1       | NP_061875.2      | 0.6916      |         | BRCA1          | NP_009225.1      | 0.6894      |                |
| REXO4                    | NP_065118.2      | 0.6893      |                              | RAD18       | NP_064550.3      | 0.6886      |         | CCDC155        | NP_653289.3      | 0.6861      |                |
| CBX8                     | NP_065700.1      | 0.686       |                              | TP53        | NP_000537.3      | 0.6849      |         | ERCC5          | NP_000114.2      | 0.6847      |                |
| RAD23B                   | NP_002865.1      | 0.6839      |                              | FIGL1       | NP_001013712.4   | 0.6826      |         | REC8           | NP_001041670.1   | 0.6813      |                |
| NFRKB                    | NP_001137307.1   | 0.6789      |                              | JMY         | NP_689618.4      | 0.6761      |         | CDC5L          | NP_001244.1      | 0.6691      |                |
| AXIN2                    | NP_004646.3      | 0.6684      |                              | PAXX        | NP_899064.1      | 0.6679      |         | HSF1           | NP_005517.1      | 0.6657      |                |
| ISY1                     | NP_065752.1      | 0.6642      |                              | NPM1        | NP_002511.1      | 0.6614      |         | EPC2           | NP_056445.3      | 0.6601      |                |
| TAOK3                    | NP_057365.3      | 0.66        |                              | SMC1A       | NP_006297.2      | 0.6594      |         | TERF2          | NP_005643.2      | 0.6591      |                |
| FAM168A                  | NP_055974.1      | 0.6589      |                              | SLF2        | NP_060591.3      | 0.6569      |         | SEM1           | NP_001188379.1   | 0.6565      |                |
| RBM17                    | NP_116294.1      | 0.6554      |                              | APLF        | NP_775816.1      | 0.6545      |         | NPAS2          | NP_002509.2      | 0.6544      |                |
| SIX6OS1                  | NP_777638.3      | 0.6517      |                              | SPIRE1      | NP_064533.3      | 0.6495      |         | CHCHD4         | NP_001091972.1   | 0.6487      |                |
| RFC1                     | NP_002904.3      | 0.6486      |                              | RAD50       | NP_005723.2      | 0.6486      |         | TCEA1          | NP_006747.1      | 0.6484      |                |
| BACH1                    | NP_001177.1      | 0.6475      |                              | RAD23A      | NP_005044.1      | 0.6469      |         | WAS            | NP_000368.1      | 0.6458      |                |
| AUNIP                    | NP_076942.1      | 0.6455      |                              | NSMCE2      | NP_775956.1      | 0.6417      |         | ZNF830         | NP_443089.3      | 0.6411      |                |
| RAD21                    | NP_006256.1      | 0.6363      |                              | BIVM-ERCC5  | NP_001191354.1   | 0.6335      |         | PWWP3A         | NP_116242.3      | 0.6303      |                |
| TERF2IP                  | NP_061848.2      | 0.627       |                              | SMC3        | NP_005436.1      | 0.6242      |         | TRIM28         | NP_005753.1      | 0.6234      |                |
| ABL1                     | NP_005148.2      | 0.6216      |                              | EYA1        | NP_000494.2      | 0.6182      |         | NABP2          | NP_076973.1      | 0.6176      |                |
| DMAPI                    | NP_061973.1      | 0.6173      |                              | XRCC1       | NP_006288.2      | 0.6168      |         | RAD52          | NP_602296.2      | 0.6162      |                |
| RMI2                     | NP_689521.1      | 0.6135      |                              | ALKBH5      | NP_060228.3      | 0.6131      |         | INO80C         | NP_919257.2      | 0.6129      |                |
| RIF1                     | NP_060621.3      | 0.6102      |                              | E9PQ18      | CCP83115         | 0.6094      |         | INIP           | NP_067041.1      | 0.6085      |                |
| MBD4                     | NP_001263199.1   | 0.6079      |                              | EYA4        | NP_004091.3      | 0.6071      |         | POLR2K         | NP_005025.1      | 0.6047      |                |
| DTL                      | NP_057532.4      | 0.6042      |                              | FANCE       | NP_068741.1      | 0.6014      |         | RNF113A        | NP_008909.1      | 0.6005      |                |
| TENT4A                   | NP_008930.2      | 0.6         |                              | NIPBL       | NP_597677.2      | 0.5982      |         | EME1           | NP_689676.2      | 0.5958      |                |
| SHLD1                    | NP_689717.2      | 0.5957      |                              | WDR33       | NP_060853.3      | 0.5953      |         | SPIRE2         | NP_115827.1      | 0.5948      |                |
| EXO1                     | NP_569082.2      | 0.5929      |                              | NBN         | NP_002476.2      | 0.5927      |         | UVSSA          | NP_065945.2      | 0.5924      |                |
| ESCO2                    | NP_001017420.1   | 0.592       |                              | ATXN3       | NP_004984.2      | 0.5896      |         | PMS2P11        | Q13670.1         | 0.5895      |                |
| A0A1W2P90                | Q13670.1         | 0.5895      |                              | POLR2D      | NP_004796.1      | 0.5879      |         | CGAS           | NP_612450.2      | 0.5862      |                |
| SIRT1                    | NP_036370.2      | 0.5846      |                              | TP73        | NP_005418.1      | 0.5827      |         | CENPS          | NP_954988.1      | 0.5821      |                |
| APBB1                    | NP_001155.1      | 0.5807      |                              | MORF4L2     | NP_036418.1      | 0.5804      |         | RNF8           | NP_003949.1      | 0.5801      |                |

|           |                |        |  |           |                |        |  |           |                |        |  |
|-----------|----------------|--------|--|-----------|----------------|--------|--|-----------|----------------|--------|--|
| SPRTN     | NP_114407.3    | 0.578  |  | ERCC6L2   | NP_064592.2    | 0.577  |  | ATRIP     | NP_569055.1    | 0.5766 |  |
| NSD2      | NP_001035889.1 | 0.5761 |  | REV3L     | NP_002903.3    | 0.576  |  | NEIL1     | NP_078884.2    | 0.5739 |  |
| SUMO1     | NP_003343.1    | 0.5739 |  | ANKLE1    | NP_689576.6    | 0.5738 |  | CSB-PGBD3 | NP_000115.1    | 0.5738 |  |
| ERCC6     | NP_000115.1    | 0.5738 |  | FIGN      | NP_060556.2    | 0.5732 |  | KIN       | NP_036443.1    | 0.571  |  |
| BLM       | NP_000048.1    | 0.5696 |  | TEX12     | NP_112565.1    | 0.569  |  | SPATA22   | NP_001164169.1 | 0.5689 |  |
| BARD1     | NP_000456.2    | 0.5687 |  | RECQL4    | NP_004251.3    | 0.5684 |  | PARP10    | NP_116178.2    | 0.5682 |  |
| POLD4     | NP_066996.3    | 0.5681 |  | MCM9      | NP_060166.2    | 0.5679 |  | BRCA2     | NP_000050.2    | 0.5669 |  |
| LIG1      | NP_000225.1    | 0.5669 |  | SMC6      | NP_001135758.1 | 0.5663 |  | PALB2     | NP_078951.2    | 0.5651 |  |
| PARG      | NP_003622.2    | 0.5651 |  | EYA3      | NP_001981.2    | 0.5636 |  | RECQL5    | NP_004250.4    | 0.5625 |  |
| PML       | NP_150241.2    | 0.558  |  | RPAIN     | NP_001028174.2 | 0.5575 |  | RFWD3     | NP_060594.3    | 0.5571 |  |
| SSRP1     | NP_003137.1    | 0.557  |  | INO80     | NP_060023.1    | 0.5555 |  | TONSL     | NP_038460.4    | 0.555  |  |
| HUWE1     | NP_113584.3    | 0.5546 |  | KIF22     | NP_015556.1    | 0.5518 |  | UBR5      | NP_056986.2    | 0.5493 |  |
| SWSAPI    | NP_787067.2    | 0.5481 |  | FANCM     | NP_065988.1    | 0.5475 |  | POLH      | NP_006493.1    | 0.5471 |  |
| HINFP     | NP_945322.1    | 0.547  |  | PMS2P1    | A4D2B8         | 0.5466 |  | MNAT1     | NP_002422.1    | 0.5464 |  |
| XPC       | NP_004619.3    | 0.546  |  | TDG       | NP_003202.3    | 0.5458 |  | MEIOC     | NP_001138552.2 | 0.5453 |  |
| POLR2F    | NP_068809.1    | 0.5447 |  | POLK      | NP_057302.1    | 0.5441 |  | DCLRE1A   | NP_055696.3    | 0.5427 |  |
| SETX      | NP_055861.3    | 0.5392 |  | TEX15     | NP_001337091.1 | 0.5388 |  | MRE11     | NP_005582.1    | 0.5384 |  |
| USP10     | NP_005144.2    | 0.5381 |  | XRCC4     | NP_071801.1    | 0.5374 |  | RPS27A    | NP_001170884.1 | 0.5342 |  |
| GEN1      | NP_001123481.3 | 0.5339 |  | TRIP12    | NP_001335252.1 | 0.5334 |  | MPG       | NP_001015052.1 | 0.5332 |  |
| EME2      | NP_001244299.1 | 0.5328 |  | GINS4     | NP_115712.1    | 0.5328 |  | DTX3L     | NP_612144.1    | 0.5309 |  |
| NEIL2     | NP_659480.1    | 0.5304 |  | SMC5      | NP_055925.2    | 0.5303 |  | POLI      | NP_009126.2    | 0.5295 |  |
| SMARCA D1 | NP_064544.2    | 0.5283 |  | SLX1A     | NP_001014999.1 | 0.5282 |  | NABP1     | NP_001026886.1 | 0.5282 |  |
| NSMCE4A   | NP_060085.2    | 0.528  |  | PAXIP1    | NP_031375.3    | 0.5276 |  | BABAM1    | NP_054892.2    | 0.5276 |  |
| REV1      | NP_057400.1    | 0.5271 |  | POLR2A    | NP_000928.1    | 0.5233 |  | FEN1      | NP_004102.1    | 0.5225 |  |
| PMS2P5    | A8MQ11         | 0.5207 |  | ABRAXAS 1 | NP_620775.2    | 0.52   |  | NSMCE3    | NP_619649.1    | 0.5189 |  |
| STUB1     | NP_005852.2    | 0.5161 |  | SMARCAL 1 | NP_054859.2    | 0.5159 |  | MLH3      | NP_001035197.1 | 0.5148 |  |
| MAGEF1    | NP_071432.2    | 0.5142 |  | UHRF1     | NP_001041666.1 | 0.5121 |  | MCRS1     | NP_006328.2    | 0.512  |  |
| RAD21L1   | NP_001130038.2 | 0.5119 |  | KAT5      | NP_874369.1    | 0.5111 |  | UBE2B     | NP_003328.1    | 0.5082 |  |
| XPA       | NP_000371.1    | 0.5076 |  | HIST3H3   | NP_003484.1    | 0.5076 |  | MUS81     | NP_079404.3    | 0.5075 |  |
| H2AFX     | NP_002096.1    | 0.5073 |  | SIRT6     | NP_057623.2    | 0.5063 |  | IGHMBP2   | NP_002171.2    | 0.5055 |  |
| EYA2      | NP_005235.3    | 0.5052 |  | TRIM25    | NP_005073.2    | 0.5047 |  | MTA1      | NP_004680.2    | 0.5042 |  |
| RMI1      | NP_001345220.1 | 0.5039 |  | TOPBP1    | NP_008958.2    | 0.5031 |  | KDM2A     | NP_036440.1    | 0.5024 |  |
| MARF1     | NP_055462.2    | 0.5019 |  | BCCIP     | NP_510868.1    | 0.5011 |  | PARP1     | NP_001609.2    | 0.501  |  |
| CIB1      | NP_006375.2    | 0.5008 |  | SPDR      | NP_001073863.1 | 0.5003 |  | DCLRE1C   | NP_001029027.1 | 0.4998 |  |
| KDM4D     | NP_060509.2    | 0.4995 |  | UBE2A     | NP_003327.2    | 0.4985 |  | FZRI      | NP_057347.2    | 0.4949 |  |
| PIF1      | NP_001273425.1 | 0.4935 |  | ZNF365    | NP_055766.2    | 0.4934 |  | RTEL1     | NP_057518.1    | 0.493  |  |
| MUTYH     | NP_001121897.1 | 0.4929 |  | CHAF1B    | NP_005432.1    | 0.4926 |  | CINP      | NP_116019.1    | 0.4922 |  |
| FIGNL1    | NP_001333494.1 | 0.4917 |  | PMS2      | NP_000526.2    | 0.4916 |  | PARP3     | NP_005476.4    | 0.4911 |  |
| KDM1A     | NP_055828.2    | 0.4892 |  | TIMELESS  | NP_003911.2    | 0.4885 |  | TTC5      | NP_612385.2    | 0.4884 |  |
| ASCC2     | NP_115580.2    | 0.4876 |  | POLM      | NP_037416.1    | 0.4867 |  | UBE2T     | NP_054895.1    | 0.486  |  |
| UBA52     | NP_001029102.1 | 0.4856 |  | NTHL1     | NP_002519.2    | 0.4855 |  | PDS5B     | NP_055847.1    | 0.4827 |  |
| PARP2     | NP_001036083.1 | 0.4801 |  | RNF138    | NP_057355.2    | 0.479  |  | BRIP1     | NP_114432.2    | 0.4775 |  |
| RAD9A     | NP_004575.1    | 0.4771 |  | TDP1      | NP_060789.2    | 0.477  |  | PPIE      | NP_001181936.1 | 0.4767 |  |
| CDC7      | NP_003494.1    | 0.4765 |  | SUPT16H   | NP_009123.1    | 0.4764 |  | ERCC1     | NP_001974.1    | 0.4752 |  |
| UNG       | NP_550433.1    | 0.4745 |  | YY1       | NP_003394.1    | 0.4733 |  | ZBTB7A    | NP_056982.1    | 0.4702 |  |
| HIST3H2 A | NP_254280.1    | 0.4688 |  | SHLD3     | NP_001352270.1 | 0.4683 |  | ALKBH2    | NP_001138846.1 | 0.4683 |  |
| HIST1H4   | NP_003529.1    | 0.4667 |  | UBE2V2    | NP_003341.1    | 0.4666 |  | ACTR5     | NP_079131.3    | 0.4657 |  |
| TREX1     | NP_338599.1    | 0.4646 |  | CUL4B     | NP_001073341.1 | 0.4643 |  | PMS1      | NP_000525.1    | 0.4642 |  |
| RAD17     | NP_579916.1    | 0.4629 |  | CSNK1E    | NP_689407.1    | 0.4629 |  | CHEK2     | NP_009125.1    | 0.4628 |  |
| TFIP11    | NP_036275.1    | 0.462  |  | APEX2     | NP_055296.2    | 0.4612 |  | RPA2      | CAG29344       | 0.4587 |  |
| MSH6      | NP_000170.1    | 0.4573 |  | APTX      | NP_001182177.1 | 0.4568 |  | MEN1      | NP_570711.1    | 0.4567 |  |
| POLQ      | NP_955452.3    | 0.456  |  | MORF4L1   | NP_006782.1    | 0.4553 |  | FAN1      | NP_055782.3    | 0.4549 |  |
| PIAS4     | NP_056981.2    | 0.4539 |  | POLL      | NP_001167555.1 | 0.4533 |  | UFD1      | NP_005650.2    | 0.4533 |  |
| GPS1      | NP_001308018.1 | 0.4531 |  | COP57A    | NP_001157566.1 | 0.453  |  | FAAP100   | NP_079437.5    | 0.4522 |  |
| EEDP1     | NP_085139.2    | 0.4521 |  | NEIL3     | NP_060718.3    | 0.4518 |  | POLR2C    | NP_116558.1    | 0.4517 |  |

|         |                |        |  |          |                |        |  |          |                |        |  |
|---------|----------------|--------|--|----------|----------------|--------|--|----------|----------------|--------|--|
| DDX11   | NP_085911.2    | 0.4513 |  | MGME1    | NP_443097.1    | 0.4507 |  | EXD2     | NP_001180289.1 | 0.4484 |  |
| ASF1A   | NP_054753.1    | 0.447  |  | UBE2W    | NP_060769.5    | 0.4455 |  | LIG3     | NP_039269.2    | 0.4442 |  |
| GTF2H1  | NP_005307.1    | 0.44   |  | MGMT     | NP_002403.3    | 0.4397 |  | PARP4    | NP_006428.2    | 0.4396 |  |
| USP43   | NP_694942.3    | 0.4389 |  | APEX1    | NP_001632.2    | 0.4383 |  | WRNIP1   | NP_064520.2    | 0.4376 |  |
| CHD1L   | NP_004275.4    | 0.4374 |  | NHEJ1    | NP_079058.1    | 0.4372 |  | AP5S1    | NP_060817.1    | 0.4365 |  |
| DCLRE1B | NP_073747.1    | 0.4356 |  | MLH1     | NP_000240.1    | 0.4351 |  | HELB     | NP_387467.2    | 0.4349 |  |
| POLA1   | NP_001317289.1 | 0.4344 |  | PMS2P2   | O95744         | 0.4342 |  | ALKBH3   | NP_631917.1    | 0.4336 |  |
| UBE2V1  | NP_001027459.1 | 0.4335 |  | ENDOV    | NP_775898.2    | 0.4331 |  | CDC14B   | NP_201588.1    | 0.4325 |  |
| EID3    | NP_001008395.1 | 0.4325 |  | FGF10    | NP_004456.1    | 0.4313 |  | POLN     | NP_861524.2    | 0.4312 |  |
| USP1    | NP_003359.3    | 0.43   |  | CHRNA4   | NP_000735.1    | 0.4298 |  | MSH3     | NP_002430.3    | 0.4297 |  |
| INTS3   | NP_075391.3    | 0.4296 |  | VCP      | NP_009057.1    | 0.429  |  | PNKP     | NP_009185.2    | 0.4279 |  |
| HDAC10  | NP_114408.3    | 0.4272 |  | COPS7B   | NP_073567.1    | 0.4266 |  | PARPBP   | NP_060385.3    | 0.4243 |  |
| POLB    | NP_002681.1    | 0.4235 |  | TDP2     | NP_057698.2    | 0.4231 |  | SHPRH    | NP_001036148.2 | 0.4225 |  |
| ERCC3   | NP_000113.1    | 0.4222 |  | POLG     | NP_002684.1    | 0.4206 |  | COPS2    | NP_004227.1    | 0.4205 |  |
| ADPRHL2 | NP_060295.1    | 0.419  |  | MCM8     | NP_115874.3    | 0.4189 |  | ZRANB3   | NP_115519.2    | 0.4175 |  |
| RAD54L  | NP_003570.2    | 0.4163 |  | ISG15    | NP_005092.1    | 0.4158 |  | UBB      | NP_061828.1    | 0.4152 |  |
| OTUB1   | NP_060140.2    | 0.4151 |  | PRIMPOL  | NP_689896.1    | 0.4146 |  | PDS5A    | NP_001093869.1 | 0.4143 |  |
| ERCC4   | NP_005227.1    | 0.4132 |  | USP28    | NP_001333181.1 | 0.4127 |  | ACTR8    | NP_075050.3    | 0.4123 |  |
| SMUG1   | NP_001338175.1 | 0.4122 |  | RFC4     | NP_853551.1    | 0.412  |  | EGFR     | NP_005219.2    | 0.4119 |  |
| DHX9    | NP_001348.2    | 0.4109 |  | TIGAR    | NP_065108.1    | 0.4106 |  | RAD9B    | NP_001273464.1 | 0.4099 |  |
| FANCG   | NP_004620.1    | 0.4095 |  | WRAP53   | NP_060551.2    | 0.4095 |  | SETMAR   | NP_006506.3    | 0.409  |  |
| ATP23   | NP_150592.1    | 0.4046 |  | CCNH     | CAG28586       | 0.404  |  | RUVBL2   | NP_006657.1    | 0.4038 |  |
| GINS2   | NP_057179.1    | 0.4038 |  | BRCC3    | NP_001018065.1 | 0.4031 |  | WDR70    | NP_060504.1    | 0.4019 |  |
| UBC     | NP_066289.3    | 0.4008 |  | HELQ     | NP_598375.2    | 0.3982 |  | TREX2    | NP_542432.2    | 0.3966 |  |
| RADX    | NP_060485.4    | 0.3966 |  | ASCC1    | NP_001185729.1 | 0.3965 |  | UBE2L6   | NP_004214.1    | 0.3961 |  |
| ALKBH1  | NP_006011.2    | 0.3959 |  | UBE2U    | NP_001353161.1 | 0.3956 |  | HUS1B    | NP_683762.2    | 0.3948 |  |
| RPS3    | NP_000996.2    | 0.3944 |  | RAD54B   | NP_036547.1    | 0.3943 |  | CENPX    | NP_001257935.1 | 0.3941 |  |
| SHLD2   | NP_001317041.1 | 0.394  |  | PRPF19   | NP_055317.1    | 0.3939 |  | RPA4     | NP_037479.1    | 0.3939 |  |
| MSH4    | NP_002431.2    | 0.3939 |  | RUVBL1   | NP_003698.1    | 0.3906 |  | CDKN2D   | NP_001791.1    | 0.3901 |  |
| SLC30A9 | NP_006336.3    | 0.3899 |  | RPA1     | NP_002936.1    | 0.3891 |  | UCHL5    | NP_001186190.1 | 0.389  |  |
| CHEK1   | NP_001107594.1 | 0.3887 |  | HERC2    | NP_004658.3    | 0.3881 |  | PRKCG    | NP_002730.1    | 0.3878 |  |
| POLG2   | NP_009146.2    | 0.3875 |  | SLF1     | NP_115666.2    | 0.3871 |  | RNASEH2A | NP_006388.2    | 0.3869 |  |
| PRMT6   | NP_060607.2    | 0.3866 |  | FANCF    | NP_073562.1    | 0.386  |  | RECQL    | NP_002898.2    | 0.3846 |  |
| PPP5C   | NP_006238.1    | 0.3836 |  | AP5Z1    | NP_055670.1    | 0.3826 |  | DDB2     | NP_000098.1    | 0.382  |  |
| SMCHD1  | NP_056110.2    | 0.3809 |  | OGG1     | NP_002533.1    | 0.3793 |  | CDC45    | NP_003495.1    | 0.3787 |  |
| PSMD14  | NP_005796.1    | 0.378  |  | PARK7    | NP_009193.2    | 0.3775 |  | FAAP24   | NP_689479.1    | 0.3768 |  |
| ERCC8   | NP_000073.1    | 0.3742 |  | FANCI    | NP_001106849.1 | 0.3733 |  | NUDT16   | NP_689608.2    | 0.3726 |  |
| CUL4A   | NP_001008895.1 | 0.3724 |  | POLD1    | NP_001243778.1 | 0.3716 |  | FTO      | NP_001073901.1 | 0.3711 |  |
| COPS5   | NP_006828.2    | 0.3708 |  | CRY2     | NP_066940.3    | 0.3704 |  | GTF2H2C  | NP_001092198.1 | 0.3686 |  |
| SMG1    | NP_055907.3    | 0.3686 |  | FANCD2   | NP_001018125.1 | 0.3676 |  | DNTT     | NP_004079.3    | 0.3657 |  |
| EXO5    | NP_001333882.1 | 0.3644 |  | DMC1     | NP_008999.2    | 0.3633 |  | POLR2I   | NP_006224.1    | 0.36   |  |
| POLD2   | NP_006221.2    | 0.3599 |  | FANCA    | NP_000126.2    | 0.3599 |  | GTF2H2   | NP_001506.1    | 0.3594 |  |
| RAD51   | NP_002866.2    | 0.3587 |  | USP47    | NP_001269588.1 | 0.3578 |  | RAD51D   | NP_002869.3    | 0.357  |  |
| NSMCE1  | NP_659547.2    | 0.3564 |  | ZSWIM7   | NP_001036162.1 | 0.3561 |  | UBE2NL   | NP_001013007.1 | 0.3557 |  |
| CDK9    | NP_001252.1    | 0.3556 |  | POLR2H   | NP_006223.2    | 0.3552 |  | GADD45A  | NP_001915.1    | 0.3542 |  |
| UVRAG   | NP_003360.2    | 0.353  |  | RAD51C   | NP_478123.1    | 0.3522 |  | UBE2D3   | NP_871620.1    | 0.3522 |  |
| FBH1    | NP_835363.1    | 0.3512 |  | POLR2E   | NP_002686.2    | 0.3511 |  | ZBTB1    | NP_001116801.1 | 0.3509 |  |
| RCHY1   | NP_056251.2    | 0.3502 |  | MSH2     | NP_000242.1    | 0.3501 |  | BTG2     | NP_006754.1    | 0.3499 |  |
| POLE2   | NP_002683.2    | 0.3494 |  | PCNA     | NP_872590.1    | 0.3476 |  | PARP9    | NP_001139576.1 | 0.347  |  |
| PRKDC   | NP_008835.5    | 0.347  |  | NPLOC4   | NP_060391.2    | 0.3469 |  | POLE     | NP_006222.2    | 0.3462 |  |
| DDX1    | NP_004930.1    | 0.3456 |  | AQR      | NP_055506.1    | 0.3448 |  | ZFYVE26  | NP_056161.2    | 0.3433 |  |
| POLR2J  | NP_006225.1    | 0.3429 |  | SAMHD1   | NP_056289.2    | 0.3416 |  | UPF1     | NP_002902.2    | 0.341  |  |
| LIG4    | NP_002303.2    | 0.3399 |  | NUDT16L1 | NP_115725.1    | 0.3396 |  | USP51    | NP_958443.1    | 0.339  |  |

|                |                |        |  |          |                |        |  |          |                |        |  |
|----------------|----------------|--------|--|----------|----------------|--------|--|----------|----------------|--------|--|
| COPS3          | NP_003644.2    | 0.3376 |  | UBE2N    | NP_003339.1    | 0.3368 |  | SPO11    | NP_036576.1    | 0.3358 |  |
| XRCC6          | NP_001460.1    | 0.3355 |  | RFC3     | NP_002906.1    | 0.3352 |  | RAD51B   | NP_001308743.1 | 0.3346 |  |
| CDK7           | NP_001790.1    | 0.3331 |  | MSH5     | NP_751898.1    | 0.3325 |  | POLR2B   | NP_000929.1    | 0.3324 |  |
| ACTL6A         | NP_004292.1    | 0.3324 |  | ATM      | NP_000042.3    | 0.3288 |  | MEIOB    | NP_001157032.1 | 0.328  |  |
| NUDT1          | NP_945188.1    | 0.3259 |  | HUS1     | NP_004498.1    | 0.3248 |  | CDK1     | NP_001777.1    | 0.3247 |  |
| USP45          | NP_001332951.1 | 0.322  |  | COPS6    | NP_006824.2    | 0.3213 |  | ASTE1    | NP_054784.2    | 0.3168 |  |
| COPS4          | NP_057213.2    | 0.3167 |  | TRRAP    | NP_003487.1    | 0.3163 |  | DNA2     | NP_001073918.2 | 0.315  |  |
| FANCB          | NP_001018123.1 | 0.3132 |  | MMS19    | NP_071757.4    | 0.3131 |  | GTF2H3   | NP_001507.2    | 0.3123 |  |
| ASCC3          | NP_006819.2    | 0.311  |  | RBX1     | NP_055063.1    | 0.3108 |  | ATR      | NP_001175.2    | 0.3097 |  |
| DDB1           | NP_001914.3    | 0.3094 |  | XAB2     | NP_064581.2    | 0.3094 |  | WRN      | NP_000544.2    | 0.3064 |  |
| BABAM2         | NP_954661.1    | 0.3061 |  | WDHD1    | NP_009017.1    | 0.3048 |  | PSME4    | NP_055429.2    | 0.3043 |  |
| RPA3           | NP_002938.1    | 0.3035 |  | RRM2B    | NP_056528.2    | 0.2993 |  | RFC2     | NP_852136.1    | 0.2992 |  |
| RAD1           | NP_002844.1    | 0.2976 |  | COPS8    | NP_006701.1    | 0.296  |  | GTF2H4   | NP_001508.1    | 0.2959 |  |
| TMEM189-UBE2V1 | NP_954673.1    | 0.2947 |  | TRIP13   | NP_004228.1    | 0.2947 |  | XRCC3    | NP_005423.1    | 0.2945 |  |
| RFC5           | NP_031396.1    | 0.2918 |  | POLR2G   | NP_002687.1    | 0.2868 |  | KLHL15   | NP_085127.2    | 0.2867 |  |
| ACTR2          | NP_005713.1    | 0.2848 |  | WDR48    | NP_065890.1    | 0.2848 |  | ERCC2    | NP_000391.1    | 0.2839 |  |
| FBXO6          | NP_060908.1    | 0.2823 |  | CDK2     | NP_001789.2    | 0.281  |  | MAD2L2   | NP_006332.3    | 0.2798 |  |
| XRCC2          | NP_005422.1    | 0.275  |  | MMS22L   | NP_001337528.1 | 0.2748 |  | PPP4C    | NP_002711.1    | 0.274  |  |
| FANCC          | NP_000127.2    | 0.2696 |  | FANCL    | NP_060532.2    | 0.2677 |  | TMEM161A | NP_060284.1    | 0.2643 |  |
| GTF2H5         | NP_997001.1    | 0.2605 |  | USP7     | NP_003461.2    | 0.25   |  | MCMDC2   | NP_775789.3    | 0.2476 |  |
| XRCC5          | NP_066964.1    | 0.2265 |  | POLR2L   | NP_066951.1    | 0.2128 |  | USP3     | NP_006528.2    | 0.2001 |  |
| MC1R           | NP_002377.4    | 0.1767 |  | ZMPSTE24 | NP_005848.2    | 0.1136 |  |          |                |        |  |

<sup>a</sup> Fifty-six high-scoring (>0.7) genes were highlighted with green.

<sup>b</sup> Yes, puncta forming; No, no puncta forming.

<sup>c</sup> Nucleoli, localizing to nucleoli.
