# Supplementary material for: MRNIP condensates promote DNA double-strand break sensing and end resection
Source: PubMed Central journal article supplement (PMC9098523; doi:10.1038/s41467-022-30303-w), 2022-05-12
Supplement: 41467_2022_30303_MOESM9_ESM.pdf [file 41467_2022_30303_MOESM9_ESM.pdf]

## Reporting Summary

Nature Portfolio wishes to improve the reproducibility of the work that we publish. This form provides structure for consistency and transparency in reporting. For further information on Nature Portfolio policies, see our [Editorial Policies](#) and the [Editorial Policy Checklist](#).

### Statistics

For all statistical analyses, confirm that the following items are present in the figure legend, table legend, main text, or Methods section.

- |     |           |
|-----|-----------|
| n/a | Confirmed |
|-----|-----------|
- The exact sample size ( $n$ ) for each experimental group/condition, given as a discrete number and unit of measurement
  - A statement on whether measurements were taken from distinct samples or whether the same sample was measured repeatedly
  - The statistical test(s) used AND whether they are one- or two-sided  
*Only common tests should be described solely by name; describe more complex techniques in the Methods section.*
  - A description of all covariates tested
  - A description of any assumptions or corrections, such as tests of normality and adjustment for multiple comparisons
  - A full description of the statistical parameters including central tendency (e.g. means) or other basic estimates (e.g. regression coefficient) AND variation (e.g. standard deviation) or associated estimates of uncertainty (e.g. confidence intervals)
  - For null hypothesis testing, the test statistic (e.g.  $F$ ,  $t$ ,  $r$ ) with confidence intervals, effect sizes, degrees of freedom and  $P$  value noted  
*Give  $P$  values as exact values whenever suitable.*
  - For Bayesian analysis, information on the choice of priors and Markov chain Monte Carlo settings
  - For hierarchical and complex designs, identification of the appropriate level for tests and full reporting of outcomes
  - Estimates of effect sizes (e.g. Cohen's  $d$ , Pearson's  $r$ ), indicating how they were calculated

*Our web collection on [statistics for biologists](#) contains articles on many of the points above.*

### Software and code

Policy information about [availability of computer code](#)

#### Data collection

Bio-rad ChemiDoc Imaging System  
ZEISS LSM 880  
icon scanner AFM instrument (Dimension FastScan Bio)  
NanoScope Analysis software (Version 1.40)

#### Data analysis

The software used to analyze data in this study are as follow: GraphPad Prism version 8, SPSS version 13.0, ZEN blue edition version 3.1, Image Lab version 5.1, ImageJ version 1.8.0, NanoScope Analysis v300r1, FlowJo X 10.0.7.

For manuscripts utilizing custom algorithms or software that are central to the research but not yet described in published literature, software must be made available to editors and reviewers. We strongly encourage code deposition in a community repository (e.g. GitHub). See the Nature Portfolio [guidelines for submitting code & software](#) for further information.

### Data

Policy information about [availability of data](#)

All manuscripts must include a [data availability statement](#). This statement should provide the following information, where applicable:

- Accession codes, unique identifiers, or web links for publicly available datasets
- A description of any restrictions on data availability
- For clinical datasets or third party data, please ensure that the statement adheres to our [policy](#)

Data are available in the main figures and Supplementary Figures. The source data underlying Figs. 1e, 1f-j, 2a-b, 2k, 2n, 3d, 4a, 4c, 4e, 4g, 5a, 5c-i, 6b-i, 7a-g, 7i-k, and Supplementary Figs. 2a-f, 3f-j, 4f, 4i-l, 5f, 5h, 6a, 6c, 6g-i, 7a-m, 8b-j and 9 are provided as a Source Data file. Source data are provided with this paper.

## Field-specific reporting

Please select the one below that is the best fit for your research. If you are not sure, read the appropriate sections before making your selection.

Life sciences  Behavioural & social sciences  Ecological, evolutionary & environmental sciences

For a reference copy of the document with all sections, see [nature.com/documents/nr-reporting-summary-flat.pdf](https://www.nature.com/documents/nr-reporting-summary-flat.pdf)

## Life sciences study design

All studies must disclose on these points even when the disclosure is negative.

|                 |                                                                                                                                                                                                                                                                                                                                                                                                                                         |
|-----------------|-----------------------------------------------------------------------------------------------------------------------------------------------------------------------------------------------------------------------------------------------------------------------------------------------------------------------------------------------------------------------------------------------------------------------------------------|
| Sample size     | No sample size calculation was performed. Sample size was determined according to our experience as well as literature reporting in terms of specific experiment. For xenograft mouse models, 4 mice were randomly chose for each group.                                                                                                                                                                                                |
| Data exclusions | No data were excluded from the analysis.                                                                                                                                                                                                                                                                                                                                                                                                |
| Replication     | Experiments from clinical samples, including Fig. 1d and Supplementary Fig. 1h, were repeated once. Experiments including Fig. 1b-c, 2c-e, 2h, 2m, 3c, 3g-i, 4d-h, 5b-f, 6b-c and Supplementary Fig. 1b-g, 3a, 5a-c, 6a-d, 6f-i, 7b-f, 7i, 7k, 7l, 8a-c, 8k were repeated independently three times. Statistical analyses for each experiment are indicated in the respective figure legends. All replication attempts were successful. |
| Randomization   | The C57BL/6 mice used in xenograft experiments were randomly allocated into IR or control groups.                                                                                                                                                                                                                                                                                                                                       |
| Blinding        | Data measurement for Immunofluorescence, Immunohistochemistry, flow cyto, Flow cytometry and colony formation were blinded to person who performed analysis.                                                                                                                                                                                                                                                                            |

## Reporting for specific materials, systems and methods

We require information from authors about some types of materials, experimental systems and methods used in many studies. Here, indicate whether each material, system or method listed is relevant to your study. If you are not sure if a list item applies to your research, read the appropriate section before selecting a response.

### Materials & experimental systems

### Methods

| n/a                                 | Involvement in the study                                        | n/a                                 | Involvement in the study                           |
|-------------------------------------|-----------------------------------------------------------------|-------------------------------------|----------------------------------------------------|
| <input type="checkbox"/>            | <input checked="" type="checkbox"/> Antibodies                  | <input checked="" type="checkbox"/> | <input type="checkbox"/> ChIP-seq                  |
| <input type="checkbox"/>            | <input checked="" type="checkbox"/> Eukaryotic cell lines       | <input type="checkbox"/>            | <input checked="" type="checkbox"/> Flow cytometry |
| <input checked="" type="checkbox"/> | <input type="checkbox"/> Palaeontology and archaeology          | <input checked="" type="checkbox"/> | <input type="checkbox"/> MRI-based neuroimaging    |
| <input type="checkbox"/>            | <input checked="" type="checkbox"/> Animals and other organisms |                                     |                                                    |
| <input type="checkbox"/>            | <input checked="" type="checkbox"/> Human research participants |                                     |                                                    |
| <input checked="" type="checkbox"/> | <input type="checkbox"/> Clinical data                          |                                     |                                                    |
| <input checked="" type="checkbox"/> | <input type="checkbox"/> Dual use research of concern           |                                     |                                                    |

## Antibodies

### Antibodies used

The primary antibodies used in Western blot targeted the following proteins: MRE11 (4847S, CST, 1:1000), Rad50 (3427S, CST, 1:1000), NBS1 (14956S, CST, 1:1000), p-NBS1 (3001S, CST, 1:1000), MRNIP (ab150917, Abcam, Cambridge, MA, USA, 1:1000), Lamin A/C (ab108595, Abcam, 1:4000), p-H2A.X (9718S, CST, 1:1000), GAPDH (60004-1-Ig, Proteintech, Rosemont, IL, USA, 1:5000), p-ATM-S1981 (AP0008, Abclonal, Wuhan, China, 1:1000), p-CHK1-S345 (2348S, CST, 1:1000),  $\alpha$ -Tubulin (66031-1-Ig, Proteintech, 1:5000) and H2A.X (A11361, Abclonal, 1:1000).

The primary antibodies used in Immunofluorescence targeted the following proteins: MRNIP (ab157629, Abcam, 1:200; ab150917, Abcam, 1:200; TA330650, Origene, 1:200), MRE11 (ab214, Abcam, 1:100), p-H2A.X (9718S, CST, 1:500), p-H2A.X (80312S, CST, 1:500), p-ATM-S1891 (AP0008, Abclonal, 1:300), RPA1 (2267S, CST, 1:50), TP53BP1 (4937, CST, 1:200), Rad51 (ET1705-96, HuaBio, Hangzhou, China, 1:100) and BrdU (66241-1-Ig, Proteintech, 1:300).

The primary antibodies used in Immunohistochemistry targeted the following proteins: MRNIP (ab157629, Abcam, 1:100; TA330650, Origene, 1:100), Ki67 (ET1609-34, HuaAn biotechnology, Hangzhou, China, 1:200).

### Validation

All antibodies used in this study were validated for their applications by the manufacturers or by ourselves using genetic knockouts.

anti-MRE11 (4847S, CST): [https://www.cellsignal.com/products/primary-antibodies/mre11-31h4-rabbit-mab/4847?site-search-type=Products&N=4294956287&Ntt=4847s&fromPage=plp&\\_requestid=3574349](https://www.cellsignal.com/products/primary-antibodies/mre11-31h4-rabbit-mab/4847?site-search-type=Products&N=4294956287&Ntt=4847s&fromPage=plp&_requestid=3574349)

anti-Rad50 (3427S, CST): [https://www.cellsignal.com/products/primary-antibodies/rad50-antibody/3427?site-search-type=Products&N=4294956287&Ntt=3427s%5C&fromPage=plp&\\_requestid=3574396](https://www.cellsignal.com/products/primary-antibodies/rad50-antibody/3427?site-search-type=Products&N=4294956287&Ntt=3427s%5C&fromPage=plp&_requestid=3574396)

anti-NBS1 (14956S, CST): [https://www.cellsignal.com/products/primary-antibodies/p95-nbs1-d6j5i-rabbit-mab/14956?site-search-type=Products&N=4294956287&Ntt=14956s&fromPage=plp&\\_requestid=3574423](https://www.cellsignal.com/products/primary-antibodies/p95-nbs1-d6j5i-rabbit-mab/14956?site-search-type=Products&N=4294956287&Ntt=14956s&fromPage=plp&_requestid=3574423)

anti-p-NBS1 (3001S, CST): [https://www.cellsignal.com/products/primary-antibodies/phospho-p95-nbs1-ser343-antibody/3001?site-search-type=Products&N=4294956287&Ntt=3001s&fromPage=plp&\\_requestid=3574447](https://www.cellsignal.com/products/primary-antibodies/phospho-p95-nbs1-ser343-antibody/3001?site-search-type=Products&N=4294956287&Ntt=3001s&fromPage=plp&_requestid=3574447)

anti-MRNIP (ab150917, Abcam): <https://www.abcam.com/c5orf45-antibody-ab150917.html>  
 anti-Lamin A/C (ab108595, Abcam): <https://www.abcam.com/lamin-a--lamin-c-antibody-epr4100-nuclear-envelope-marker-ab108595.html>  
 anti-p-H2A.X (9718S, CST): [https://www.cellsignal.com/products/primary-antibodies/phospho-histone-h2a-x-ser139-20e3-rabbit-mab/9718?site-search-type=Products&N=4294956287&Ntt=%289718s&fromPage=plp&\\_requestid=3574709](https://www.cellsignal.com/products/primary-antibodies/phospho-histone-h2a-x-ser139-20e3-rabbit-mab/9718?site-search-type=Products&N=4294956287&Ntt=%289718s&fromPage=plp&_requestid=3574709)  
 anti-GAPDH (60004-1-Ig, Proteintech): <https://www.ptglab.com/products/GAPDH-Antibody-60004-1-Ig.htm>  
 anti-p-ATM-S1981 (AP0008, Abclonal): <https://abclonal.com.cn/catalog/AP0008>  
 anti-p-CHK1-S345 (2348S, CST): [https://www.cellsignal.com/products/primary-antibodies/phospho-chk1-ser345-133d3-rabbit-mab/2348?site-search-type=Products&N=4294956287&Ntt=2348s&fromPage=plp&\\_requestid=3575775](https://www.cellsignal.com/products/primary-antibodies/phospho-chk1-ser345-133d3-rabbit-mab/2348?site-search-type=Products&N=4294956287&Ntt=2348s&fromPage=plp&_requestid=3575775)  
 anti- $\alpha$ -Tubulin (66031-1-Ig, Proteintech): <https://www.ptglab.com/products/tubulin-Alpha-Antibody-66031-1-Ig.htm>  
 anti-H2A.X (A11361, Abclonal): <https://abclonal.com.cn/Datasheet/Antibodies/A11361.pdf>  
 anti-MRNIP (157629, Abcam): <https://www.abcam.com/c5orf45-antibody-n-terminal-ab157629.html>  
 anti-MRNIP (TA330650, Origene): <https://www.origene.com/catalog/antibodies/primary-antibodies/ta330650/c5orf45-mrnip-rabbit-polyclonal-antibody>  
 anti-MRE11 (ab214, Abcam): <https://www.abcam.com/mre11-antibody-12d7-bsa-and-azide-free-ab214.html>  
 anti-p-H2A.X (80312S, CST): [https://www.cellsignal.com/products/primary-antibodies/phospho-histone-h2a-x-ser139-d7t2v-mouse-mab/80312?\\_=1649600780989&Ntt=p-H2A.X%20\(80312S&tahead=true](https://www.cellsignal.com/products/primary-antibodies/phospho-histone-h2a-x-ser139-d7t2v-mouse-mab/80312?_=1649600780989&Ntt=p-H2A.X%20(80312S&tahead=true)  
 anti-RPA1 (2267S, CST): [https://www.cellsignal.com/products/primary-antibodies/rpa70-rpa1-antibody/2267?\\_=1649601470643&Ntt=rpa1%20\(2267s,&tahead=true](https://www.cellsignal.com/products/primary-antibodies/rpa70-rpa1-antibody/2267?_=1649601470643&Ntt=rpa1%20(2267s,&tahead=true)  
 anti-TP53BP1 (4937, CST): [https://www.cellsignal.com/products/primary-antibodies/53bp1-antibody/4937?site-search-type=Products&N=4294956287&Ntt=tp53bp1+%284937&fromPage=plp&\\_requestid=3577300](https://www.cellsignal.com/products/primary-antibodies/53bp1-antibody/4937?site-search-type=Products&N=4294956287&Ntt=tp53bp1+%284937&fromPage=plp&_requestid=3577300)  
 anti-Rad51 (ET1705-96, HuaBio): <https://www.huabio.com/products/rad51-antibody-clone-jm54-26-recombinant-mono-clonal-et1705-96>  
 anti-BrdU (66241-1-Ig, Proteintech): <https://www.ptglab.com/products/BrDu-Antibody-66241-1-Ig.htm>  
 anti-Ki67 (ET1609-34, HuaAn biotechnology): <https://www.huabio.com/products/ki67-antibody-clone-st50-01-recombinant-mono-clonal-et1609-34>

## Eukaryotic cell lines

Policy information about [cell lines](#)

|                                                                   |                                                                                                                                   |
|-------------------------------------------------------------------|-----------------------------------------------------------------------------------------------------------------------------------|
| Cell line source(s)                                               | HEK 293T cells (ATCC), HeLa cells (Guangzhou Cellcook Biotech Co., Ltd), sf9 insect cells (Guangzhou Cellcook Biotech Co., Ltd).  |
| Authentication                                                    | HEK 293T, HeLa and sf9 cells were authenticated using STR profiling by the provider ATCC and Guangzhou Cellcook Biotech Co., Ltd. |
| Mycoplasma contamination                                          | All cell lines were mycoplasma-free.                                                                                              |
| Commonly misidentified lines (See <a href="#">ICLAC</a> register) | No commonly misidentified cell lines were used.                                                                                   |

## Animals and other organisms

Policy information about [studies involving animals](#); [ARRIVE guidelines](#) recommended for reporting animal research

|                         |                                                                                                                                                                                                                                                                                                                                          |
|-------------------------|------------------------------------------------------------------------------------------------------------------------------------------------------------------------------------------------------------------------------------------------------------------------------------------------------------------------------------------|
| Laboratory animals      | 5-week-old male NOG mice (NOD.Cg-PrkdcscidIl2rgtm1Sug/Jicrl) purchased from Charles River were used in this study. All mice were housed under specific pathogen-free conditions with access to food and water. All mice were maintained in ambient room temperature (23 +/- 3?) with humidity of 40-70% and light/dark cycle of 12h/12h. |
| Wild animals            | No wild animals were used in this study.                                                                                                                                                                                                                                                                                                 |
| Field-collected samples | No field-collected samples were used in this study.                                                                                                                                                                                                                                                                                      |
| Ethics oversight        | All animal experiments were approved by the Institutional Animal Care and Use Committee of the Sixth Affiliated Hospital of Sun Yat-sen University (Accreditation No. IACUC-2020052503).                                                                                                                                                 |

Note that full information on the approval of the study protocol must also be provided in the manuscript.

## Human research participants

Policy information about [studies involving human research participants](#)

|                            |                                                                                                                                                                                                                               |
|----------------------------|-------------------------------------------------------------------------------------------------------------------------------------------------------------------------------------------------------------------------------|
| Population characteristics | tissues from CRC patients: CRC and adjacent non-tumor tissues from 213 patients. All these patients were Chinese. Their mean age was 54.08; Male vs Female=150 vs 63. More details could be found in Source Data.             |
| Recruitment                | Tissues were obtained from the Tissue Bank of the Sixth Affiliated Hospital, Sun Yat-sen University. CRC Patients receiving neo-adjuvant chemo-radiotherapy and subsequent radical CRC surgery among 2010-2017 were involved. |

Ethics oversight

Informed consent was obtained from each patient, and the protocol was approved by the Institutional Research Ethics Committee of the Sixth Affiliated Hospital of Sun Yat-sen University.

Note that full information on the approval of the study protocol must also be provided in the manuscript.

## Flow Cytometry

### Plots

Confirm that:

- The axis labels state the marker and fluorochrome used (e.g. CD4-FITC).
- The axis scales are clearly visible. Include numbers along axes only for bottom left plot of group (a 'group' is an analysis of identical markers).
- All plots are contour plots with outliers or pseudocolor plots.
- A numerical value for number of cells or percentage (with statistics) is provided.

### Methodology

Sample preparation

For DNA repair reporter analysis, cells were seeded in 10cm dish for 24 hours before transfected with 2.5 ug pLCN DSB Repair Reporter, 4 ug pCAGGS DRR mCherry Donor EF1a BFP and 2.5 ug pCBASceI plasmid (these plasmids were gifts from Jan Karlseder (Addgene plasmid # 98896; <http://n2t.net/addgene:98896>; RRID: Addgene\_98896). Forty-eight hours after transfection, cells were trypsinized and resuspended in 1xPBS supplemented with 5% FBS and subjected to flow cytometry analysis. For cell cycle analysis, cells were trypsinized, resuspended in a detergent-containing hypotonic solution and subjected to flow cytometry analysis as described previously.

Instrument

CytoFLEX, Beckman, Pasadena, USA

Software

FlowJo X 10.0.7 was used to analyze data.

Cell population abundance

Cell line were used in this experiments, which was a pure population.

Gating strategy

BFP+ cells were gated for mCherry analysis.

- Tick this box to confirm that a figure exemplifying the gating strategy is provided in the Supplementary Information.
